# Supplementary material for: Effect Declines Are Systematic, Strong, and Ubiquitous: A Meta-Meta-Analysis of the Decline Effect in Intelligence Research
Source: PubMed Central journal article supplement (PMC6930891; doi:10.3389/fpsyg.2019.02874), 2019-12-19

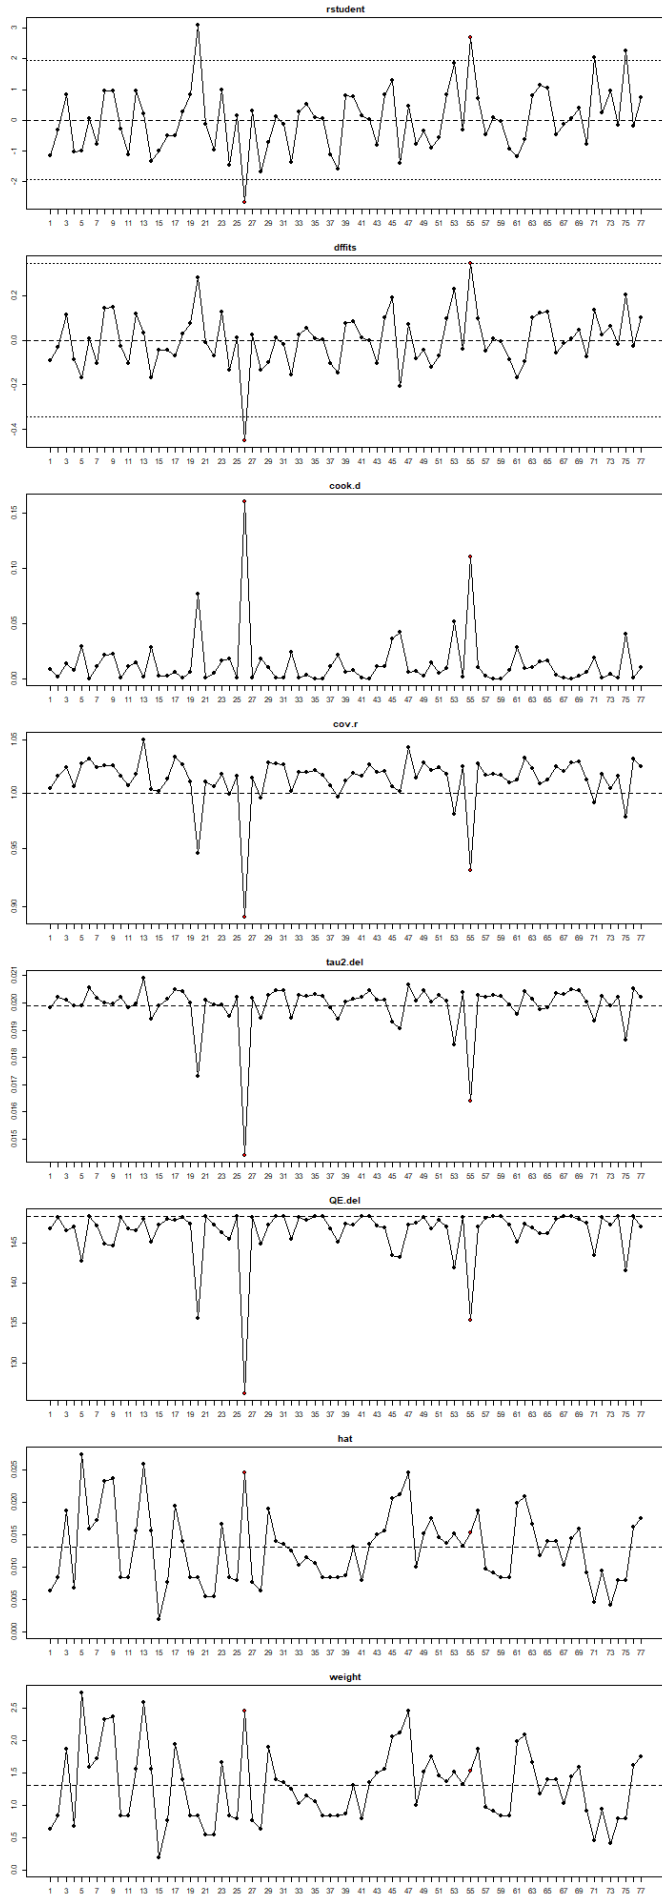

Initial study number: 4

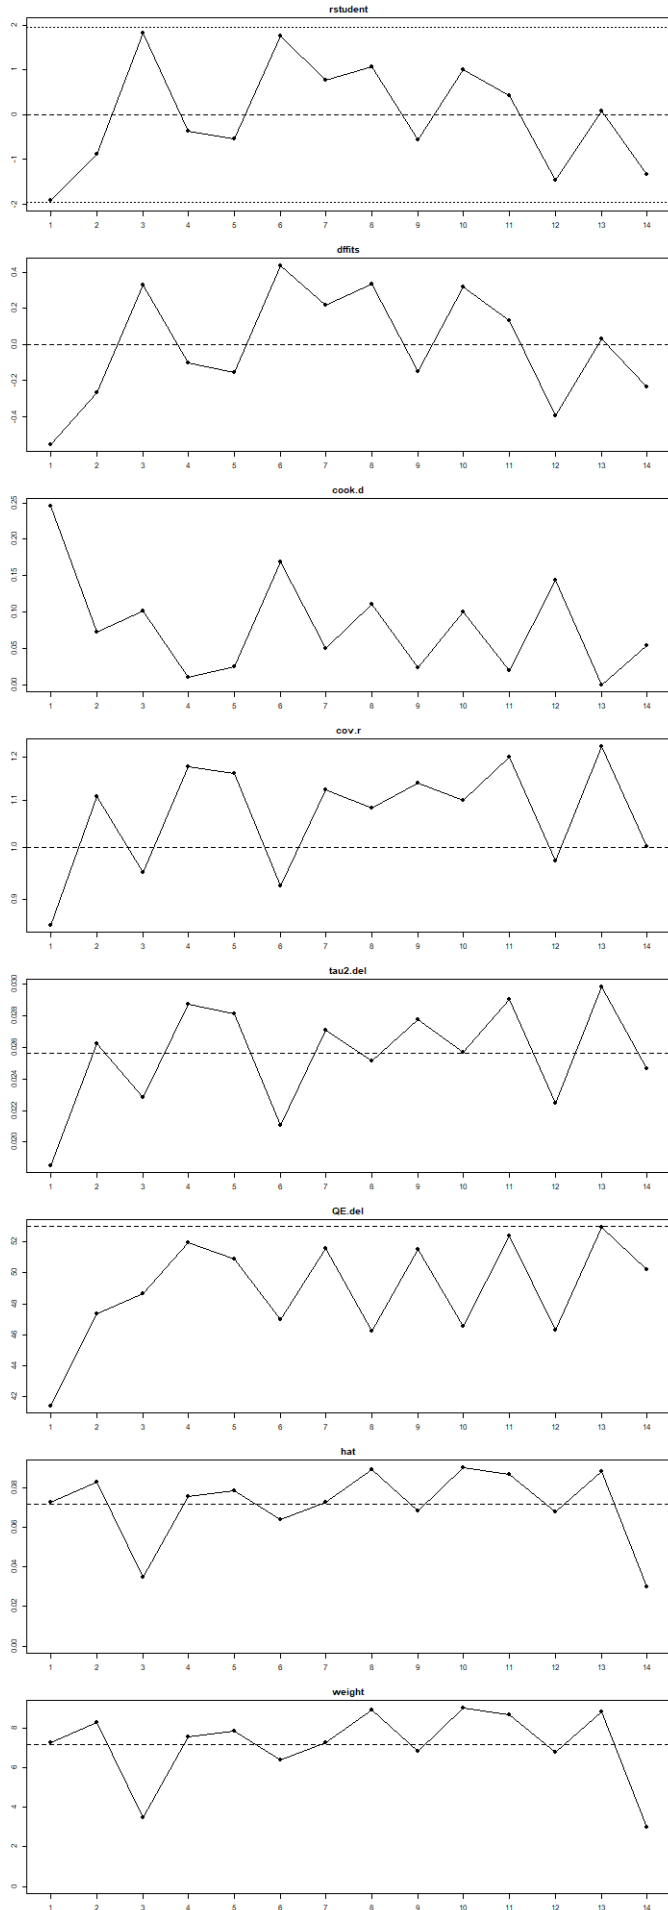

# Beaujean (2005)

## Initial study: 1

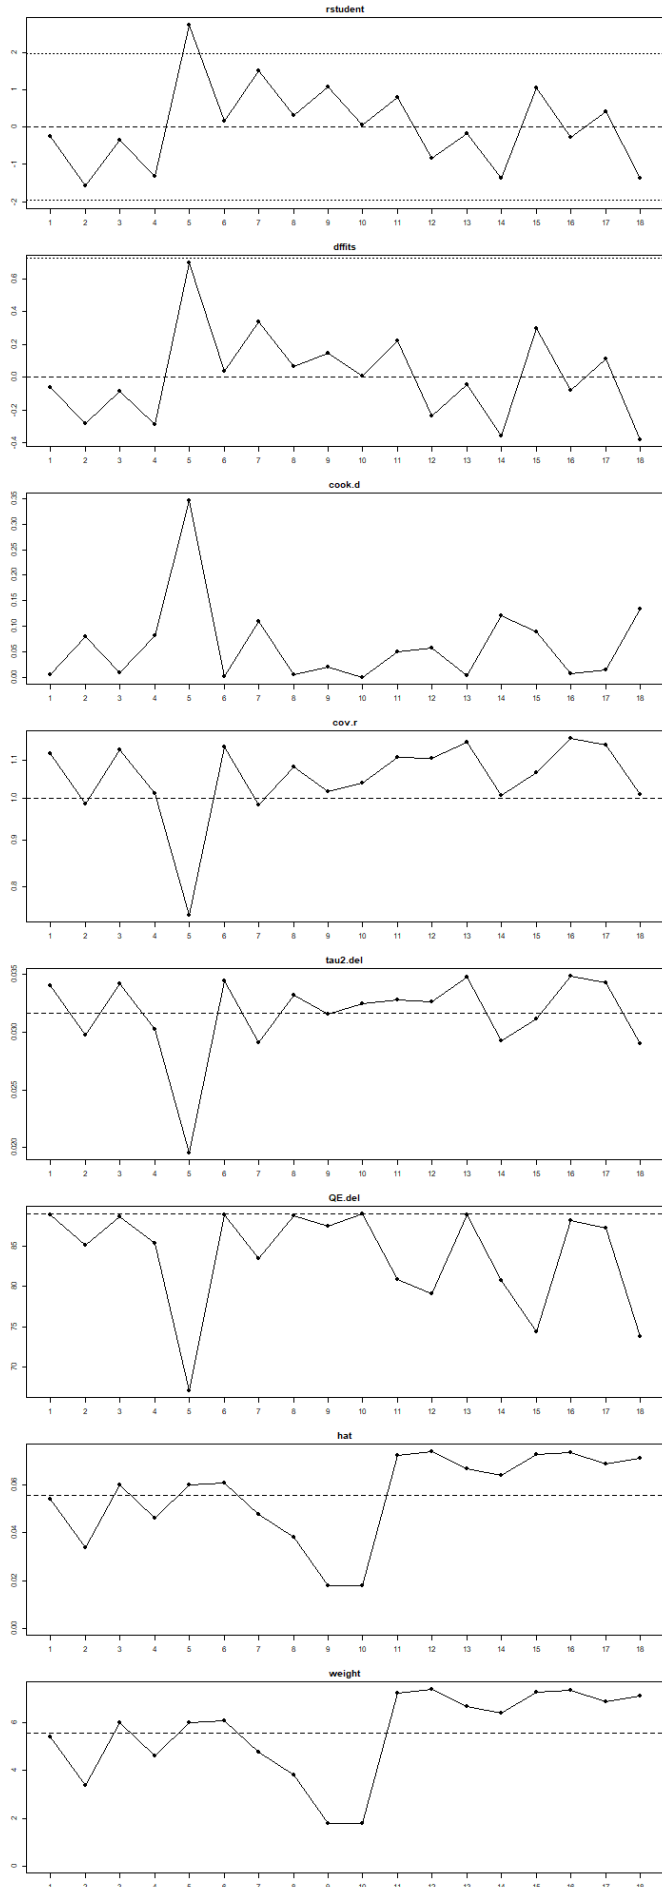

Initial study: 7

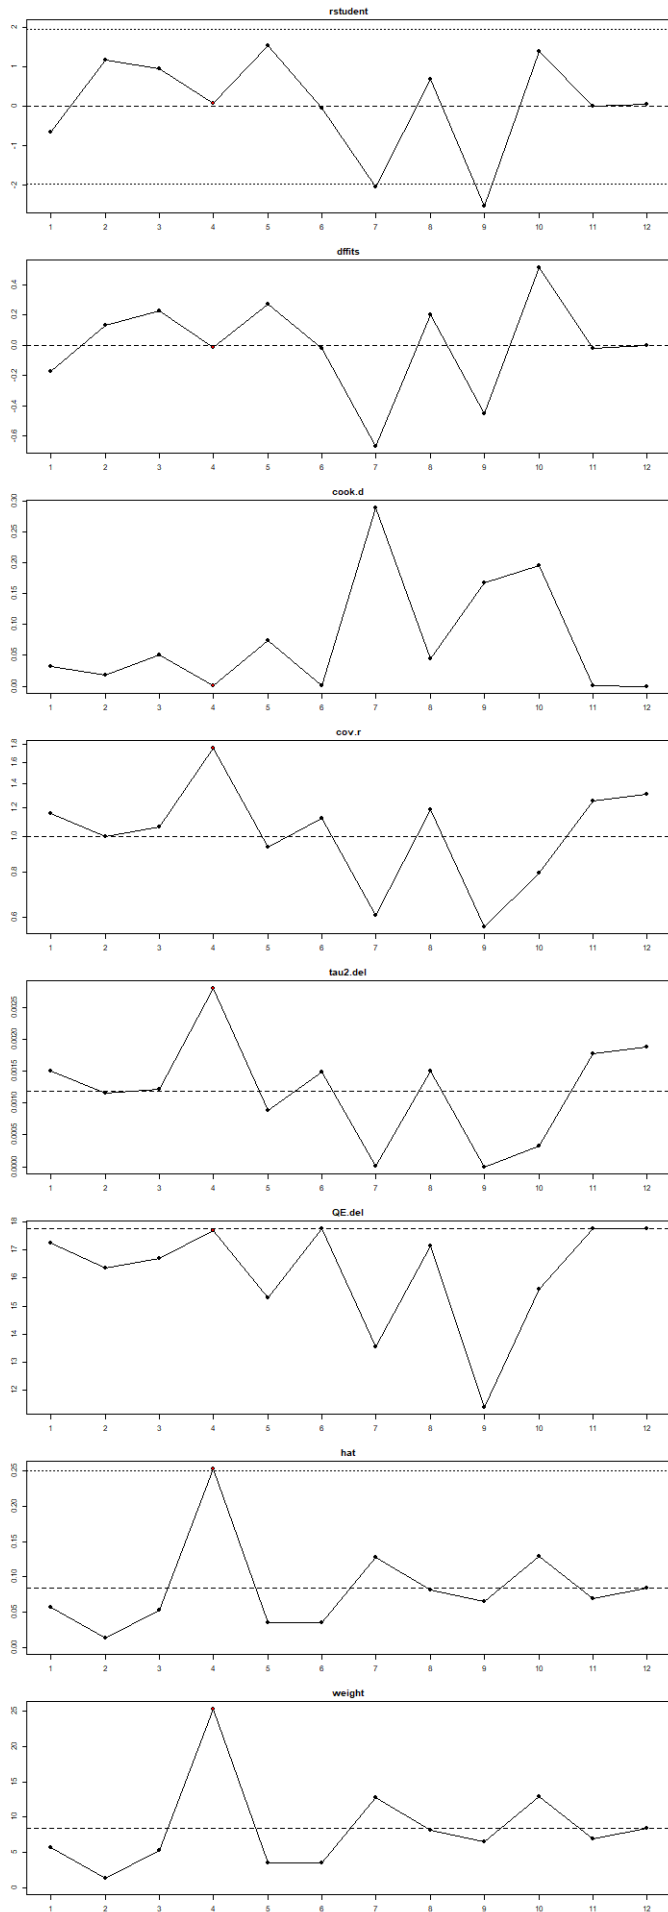

Initial study: 1

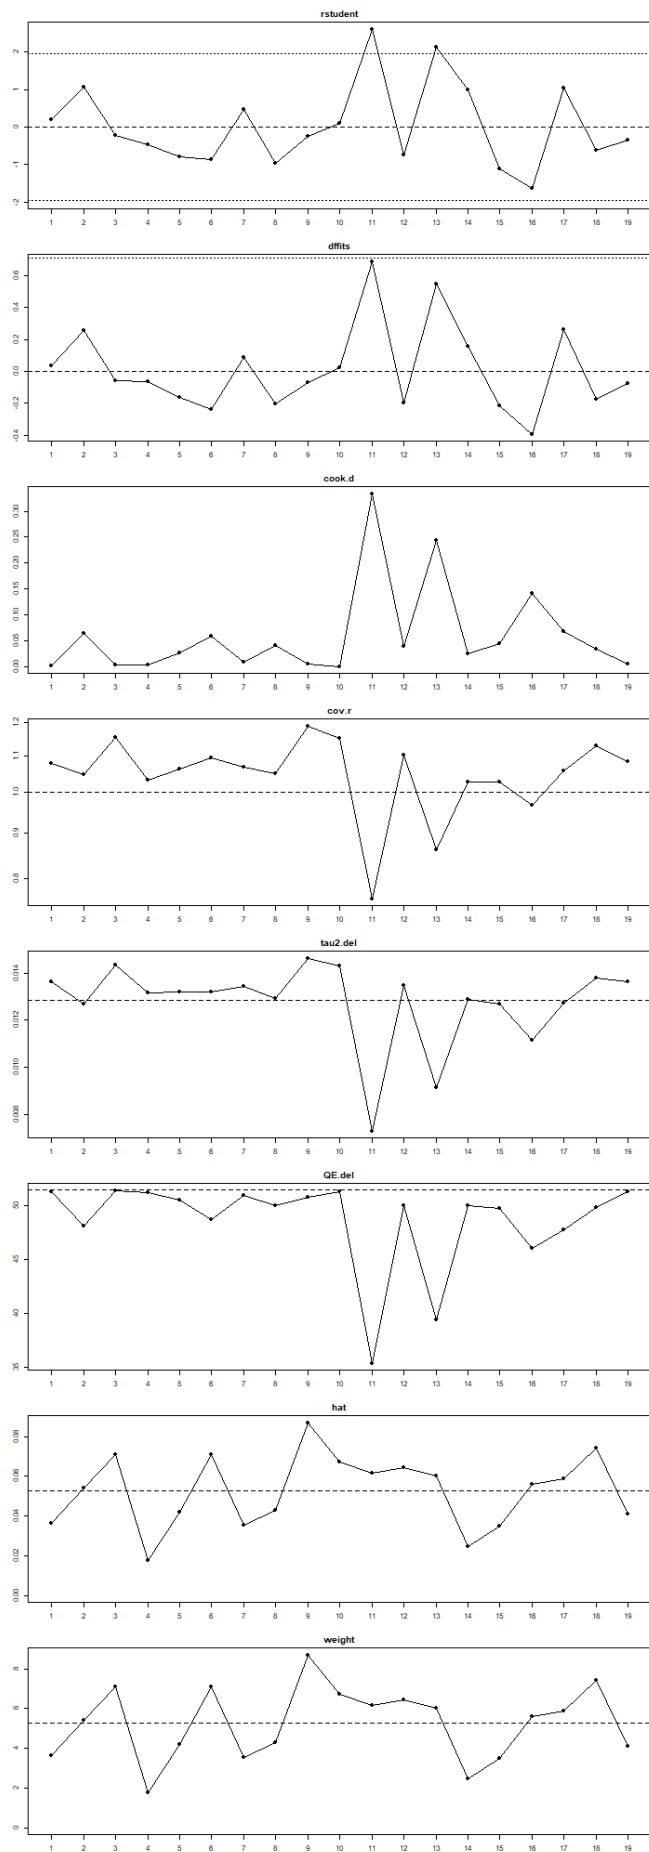

# Gignac & Bates (2017)

## Initial study: 1

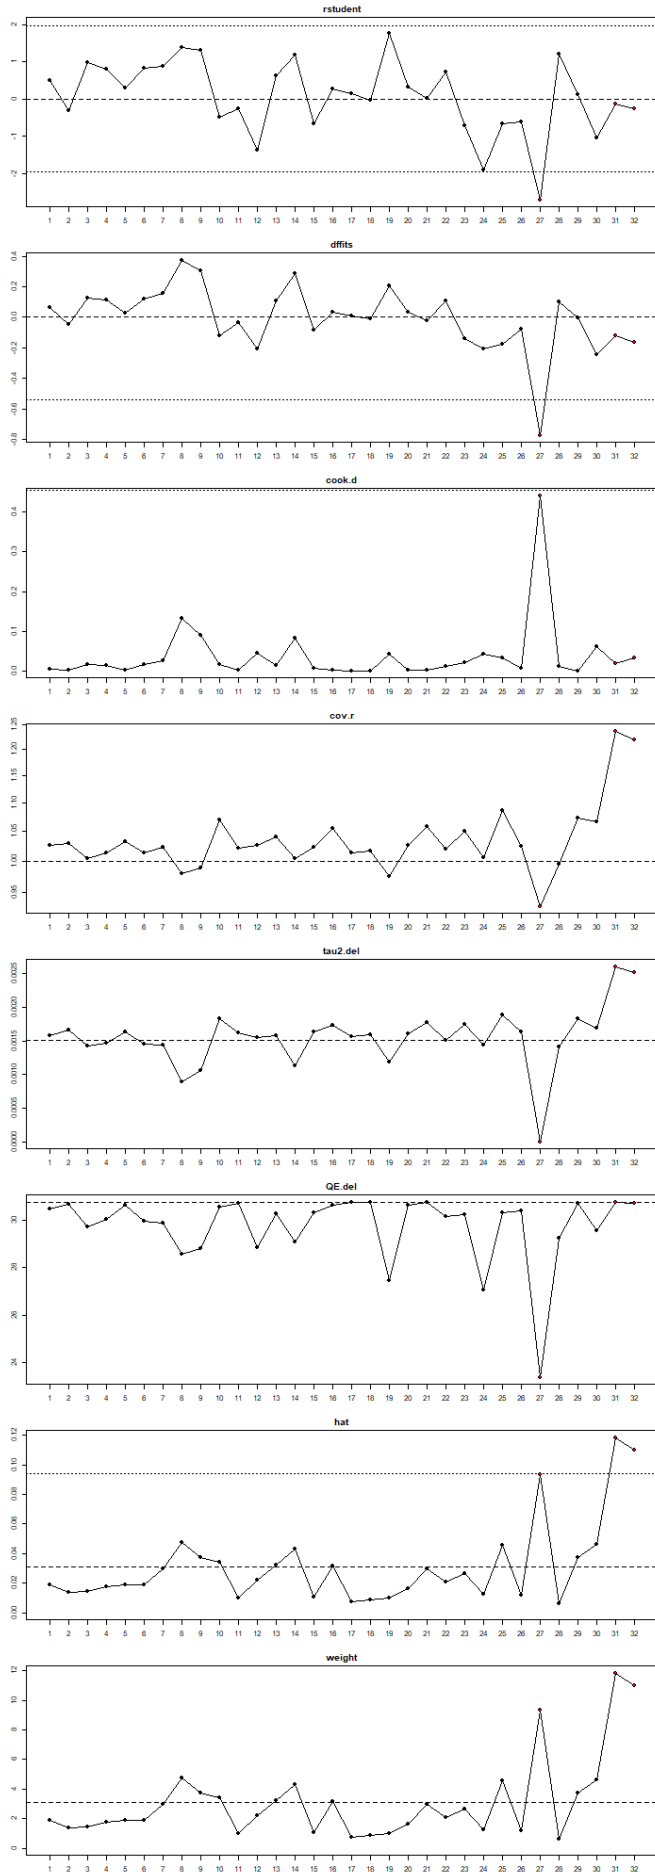

# Grudnik & Kranzler (2001)

## Initial study: 1

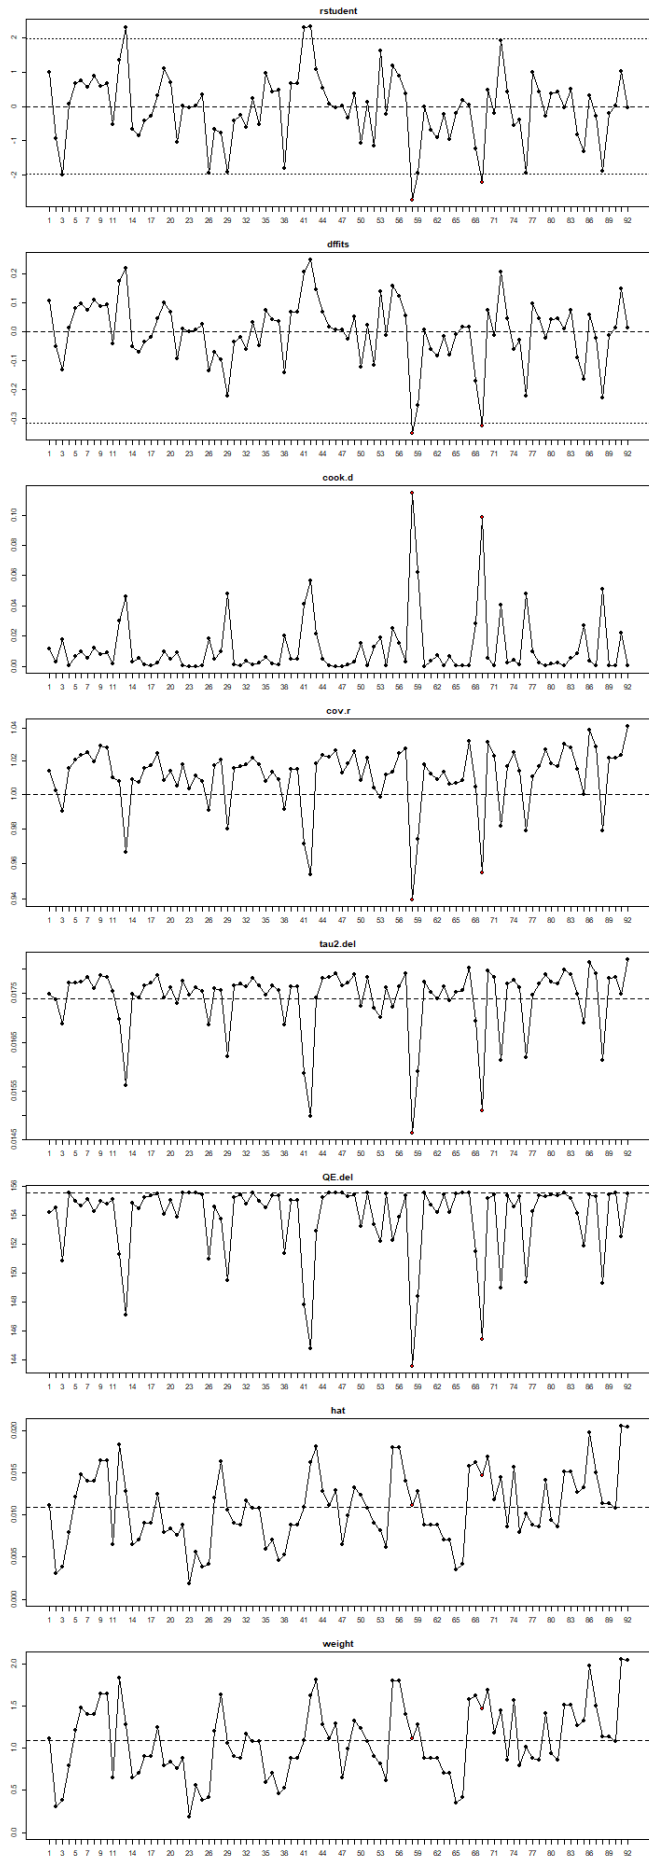

# Kranzler & Jensen (1989)

## Initial study: 19

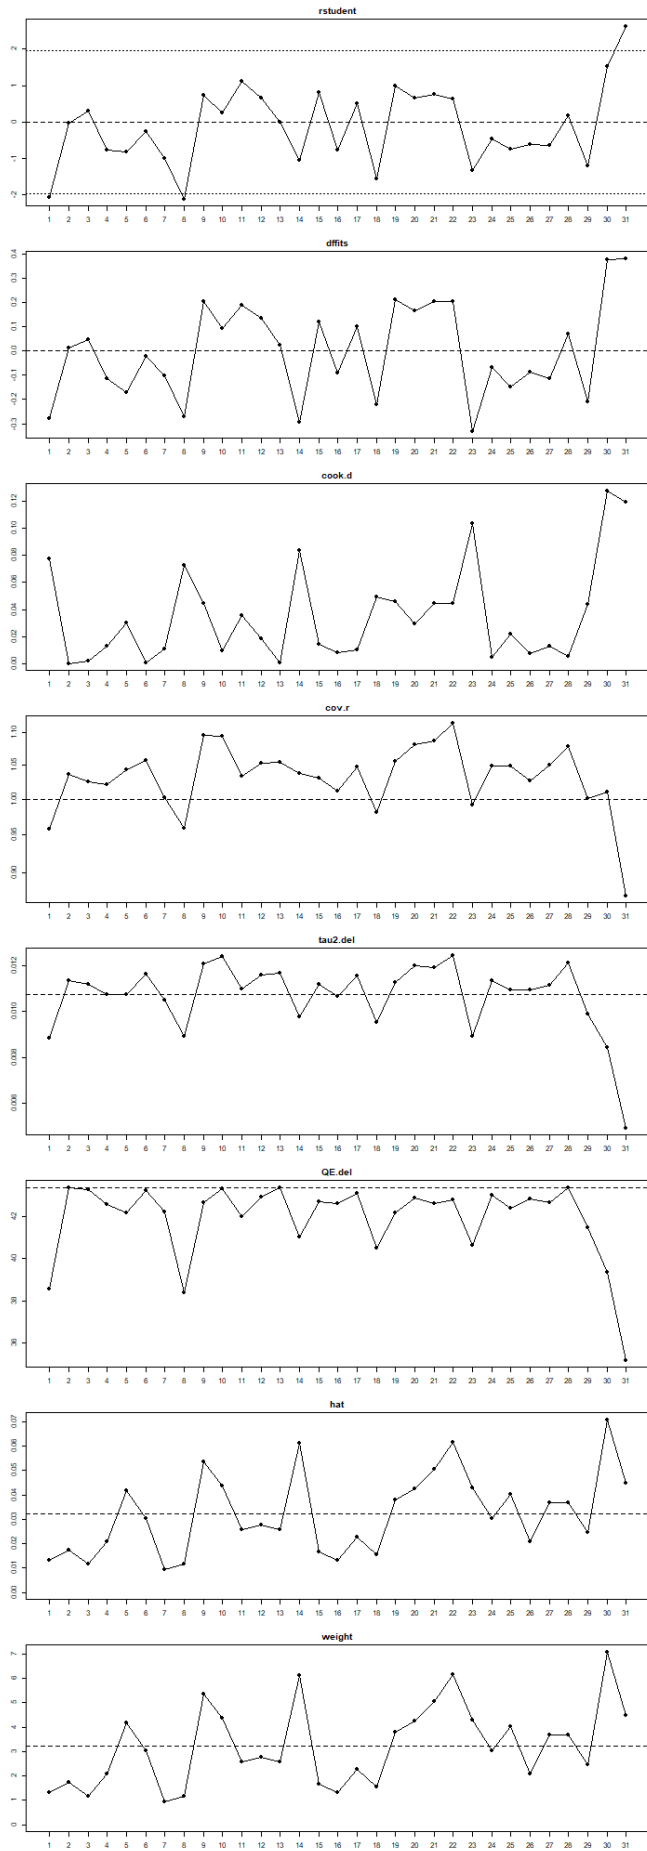



Initial study: 5

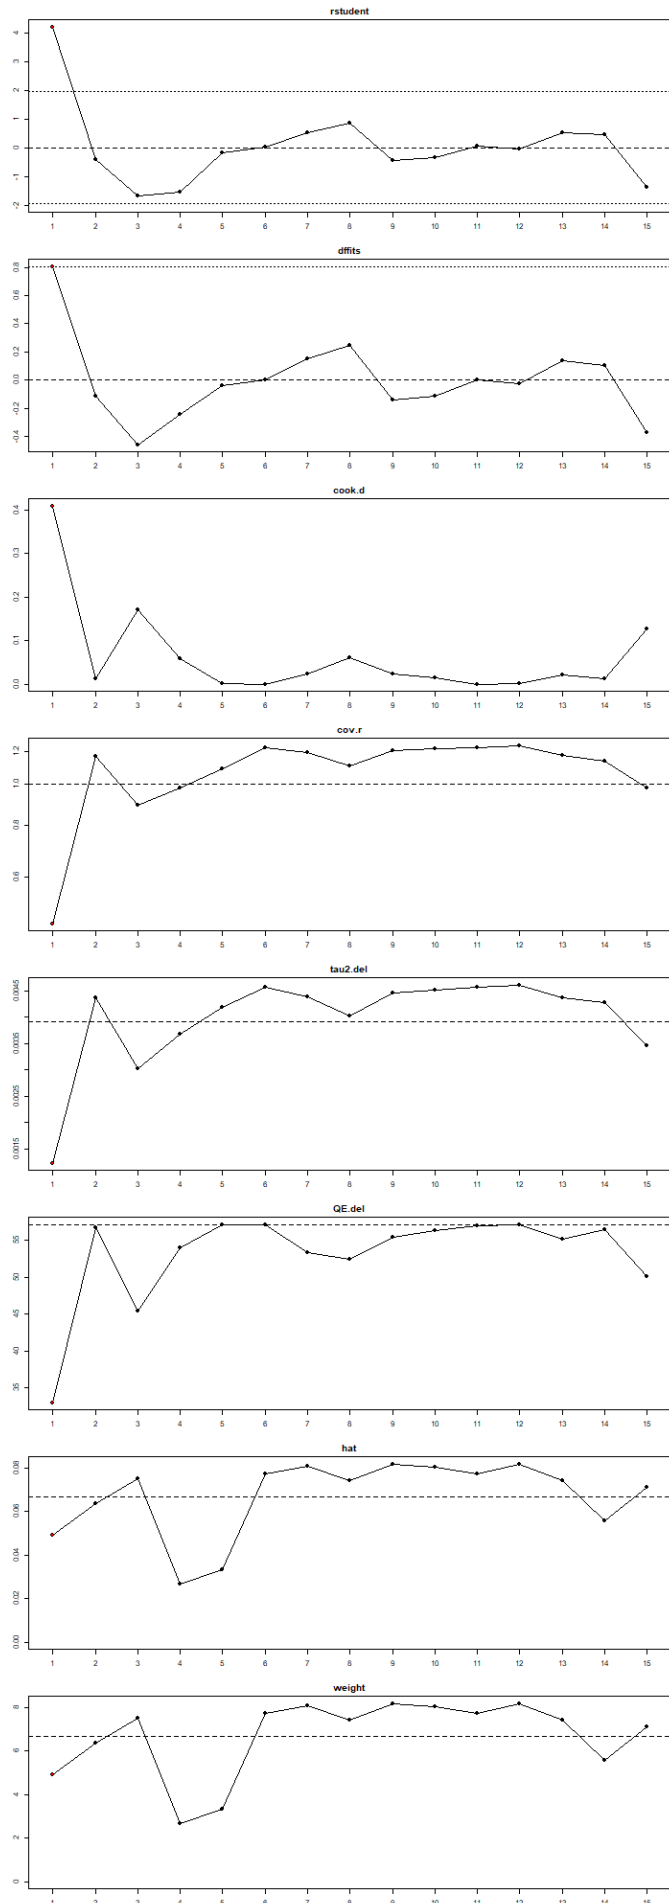

Initial study: 1

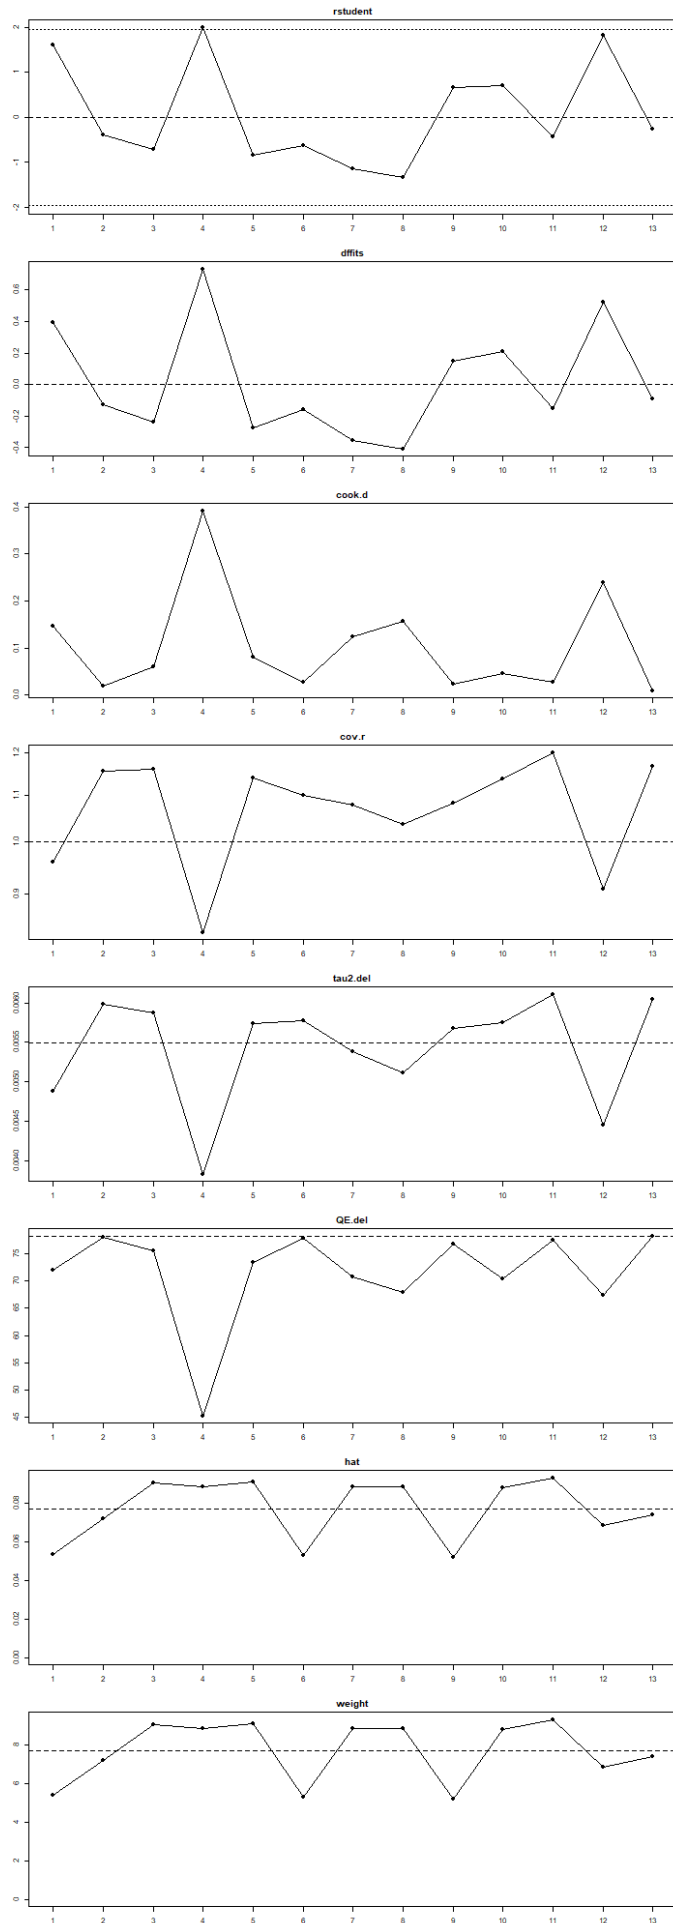

Initial study: 1

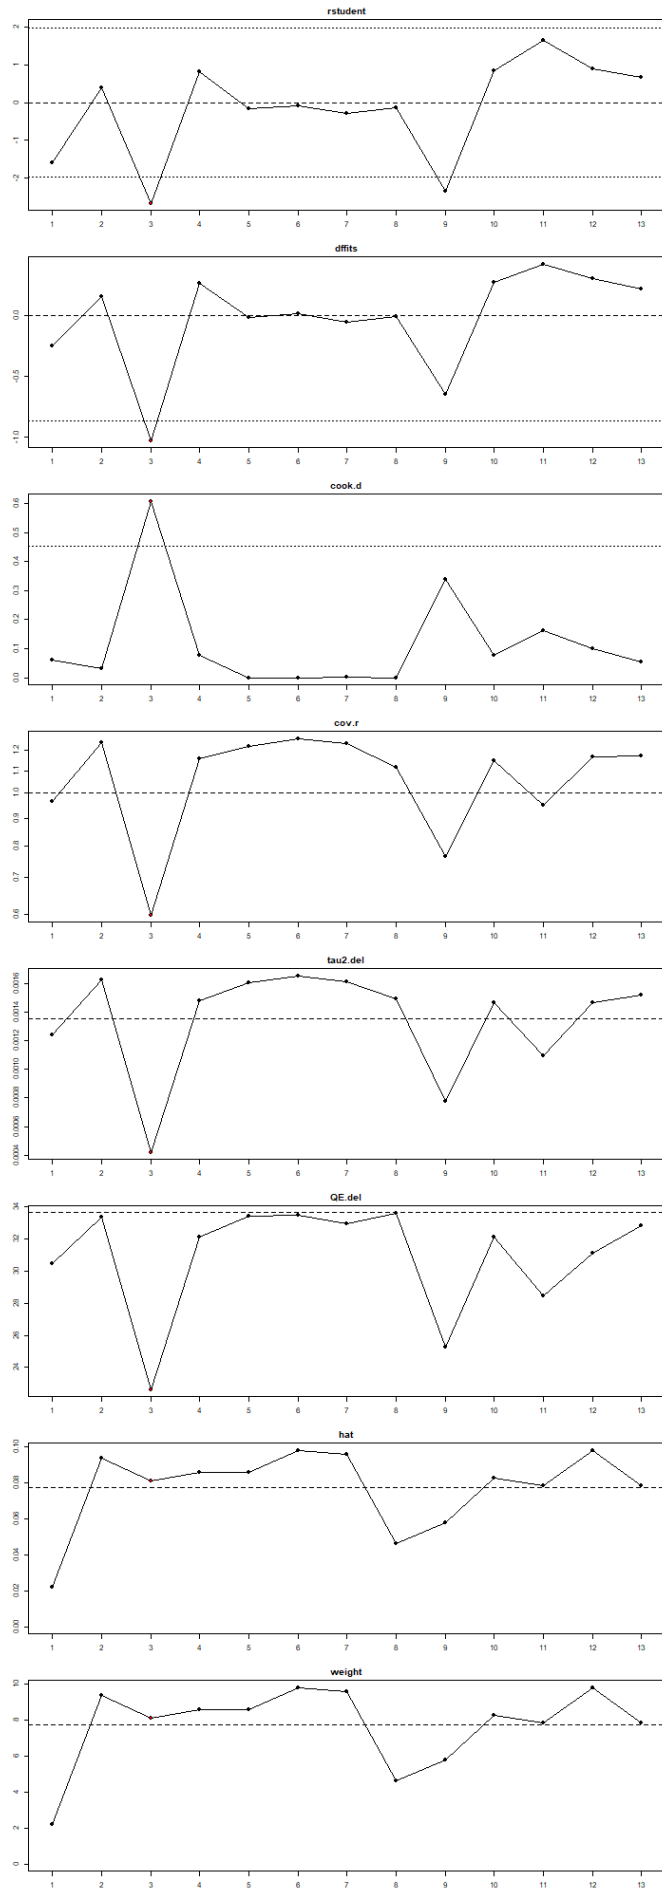

Initial study: 1

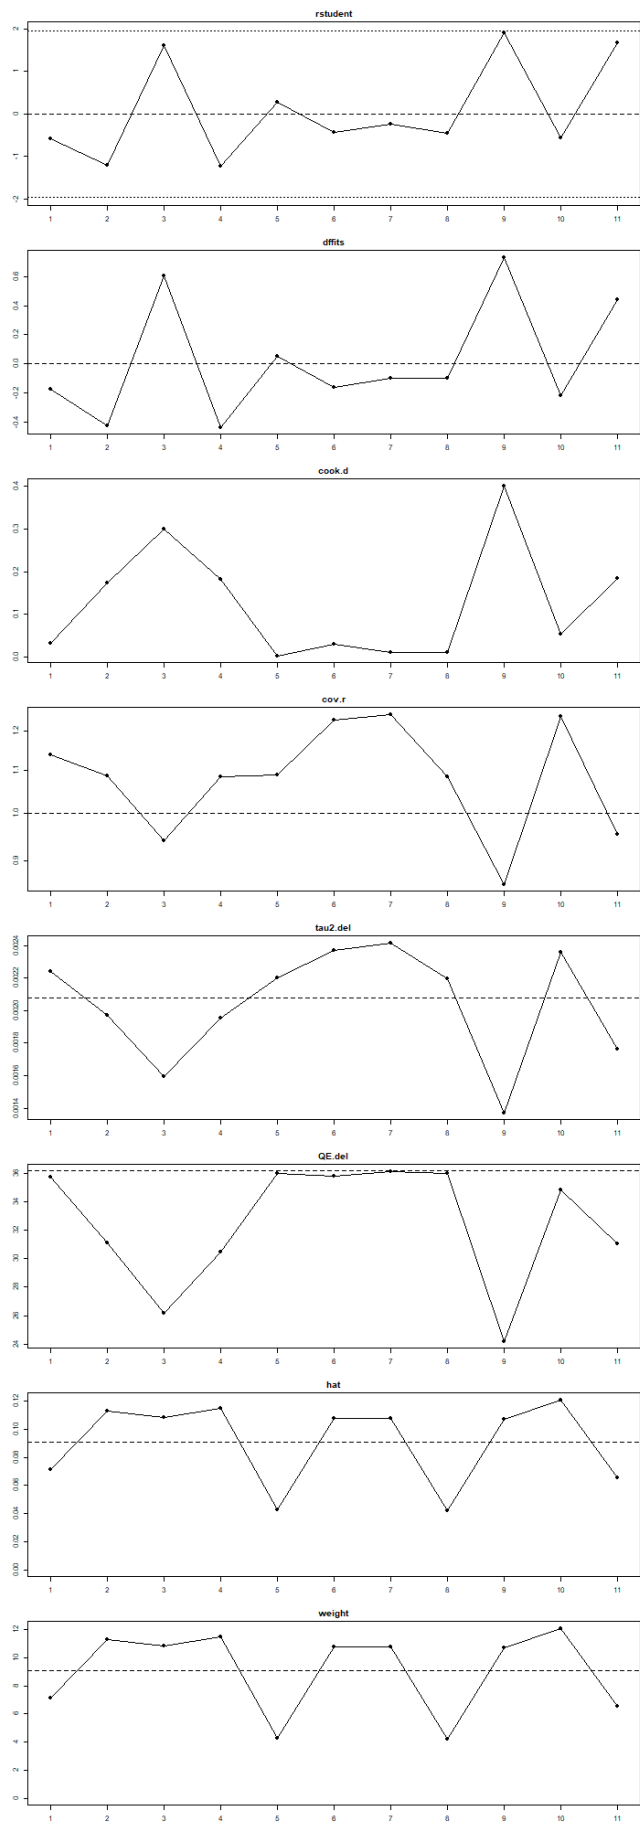

# McDaniel (2005)

## Initial study: 1

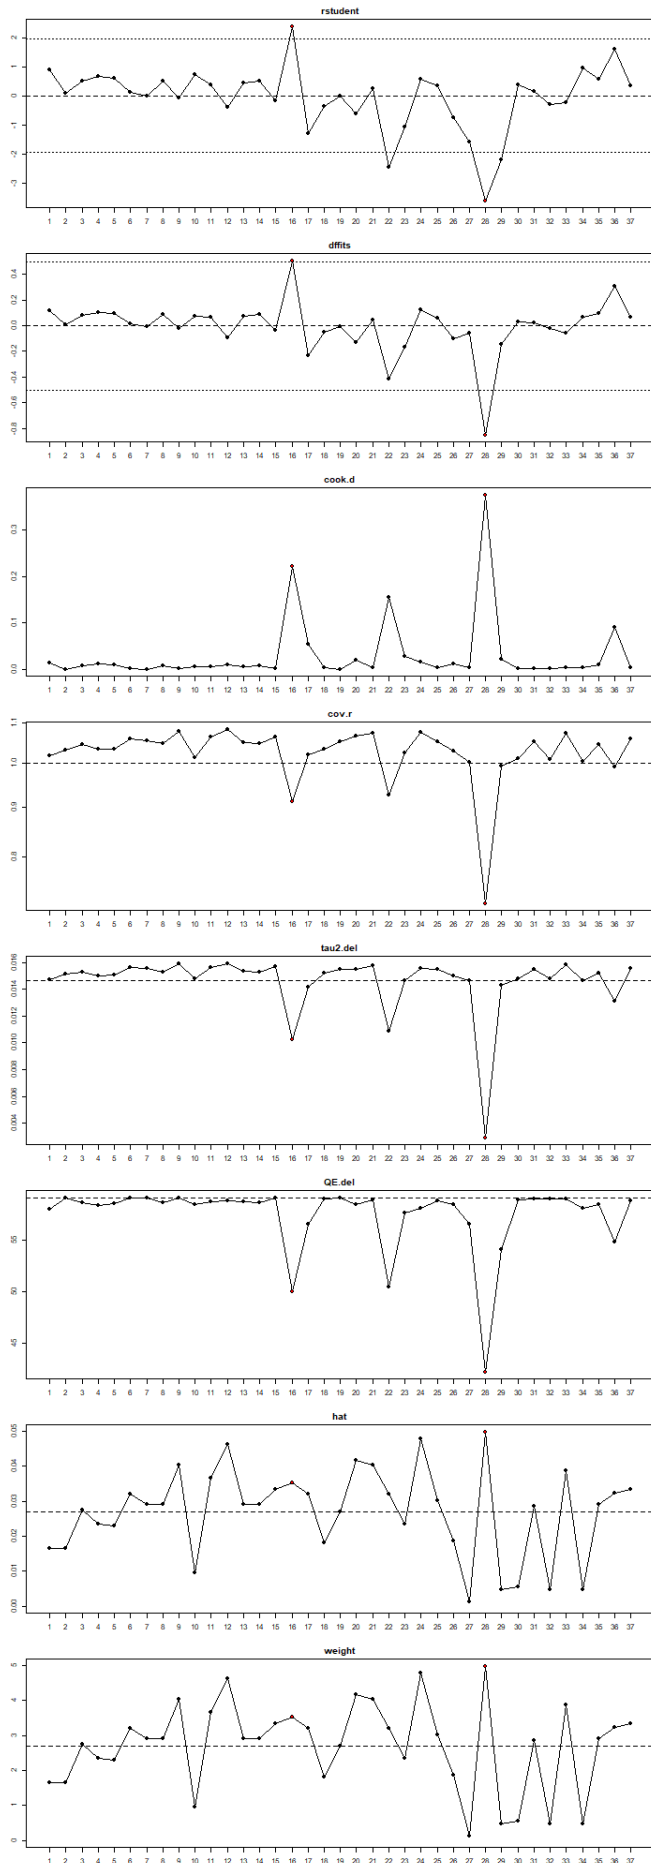

Initial study: 15

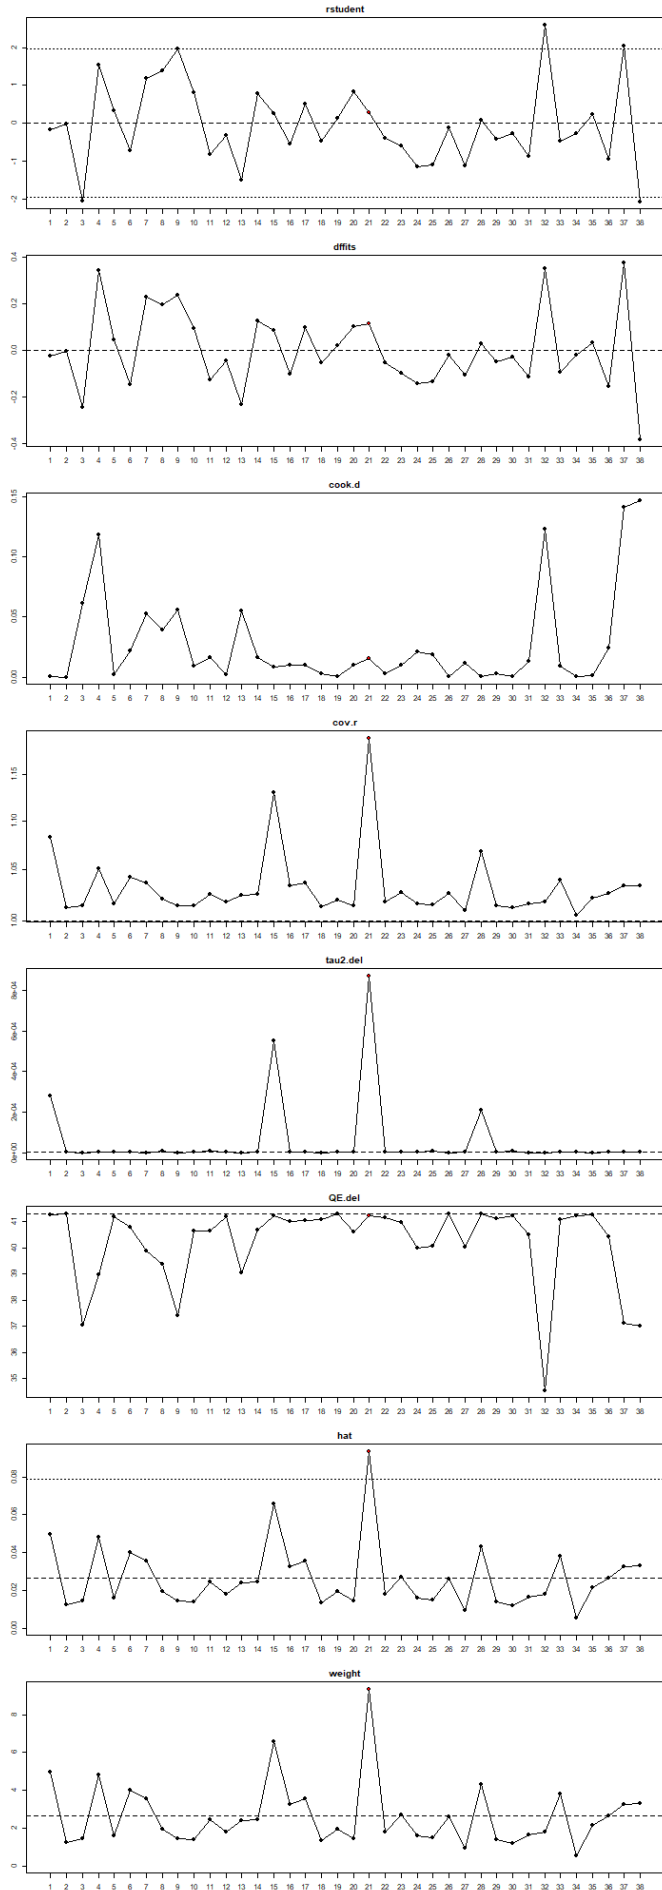

Initial study: 8

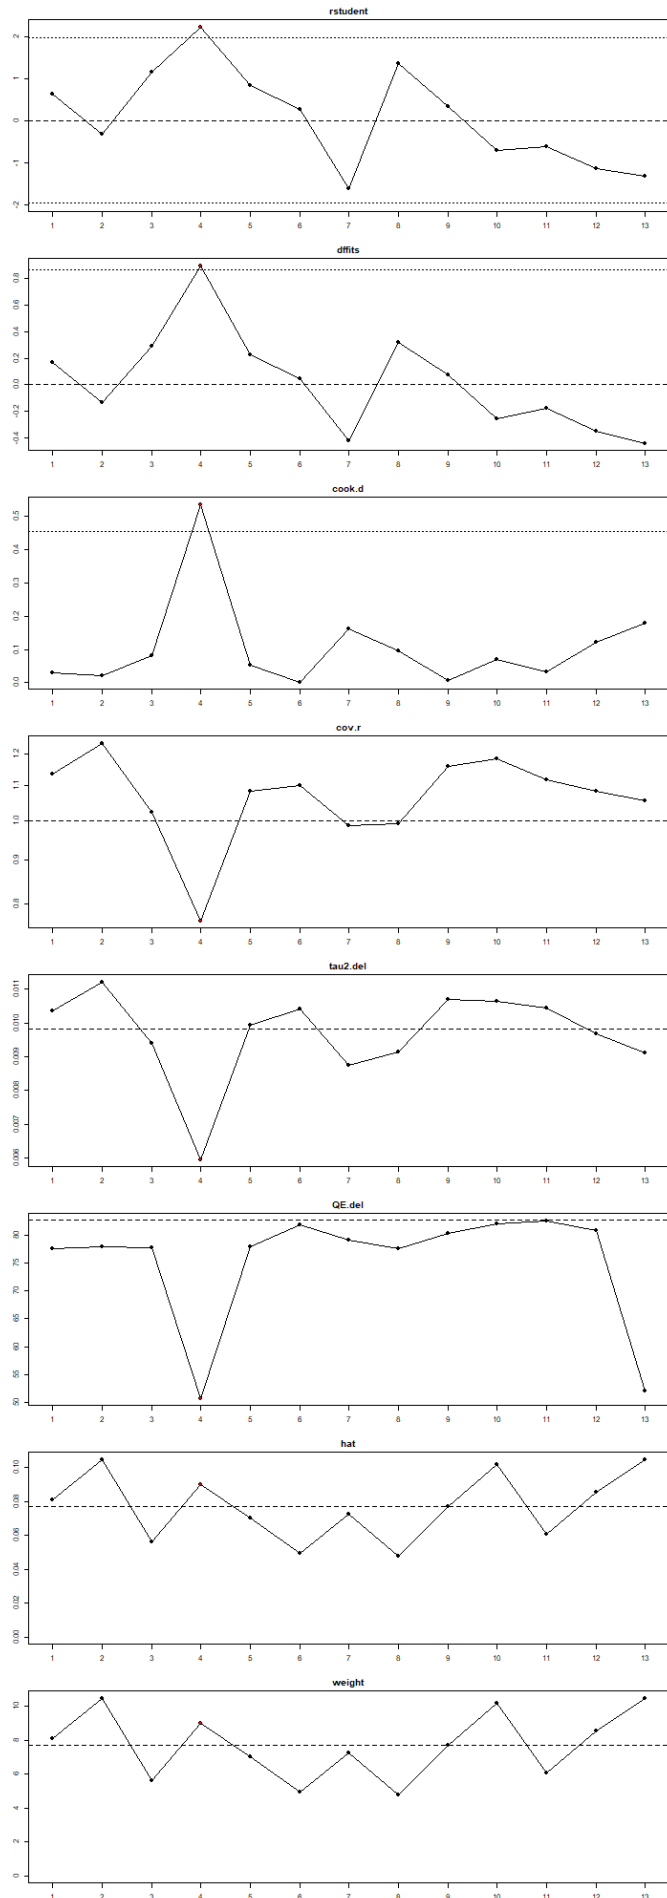

Initial study: 3

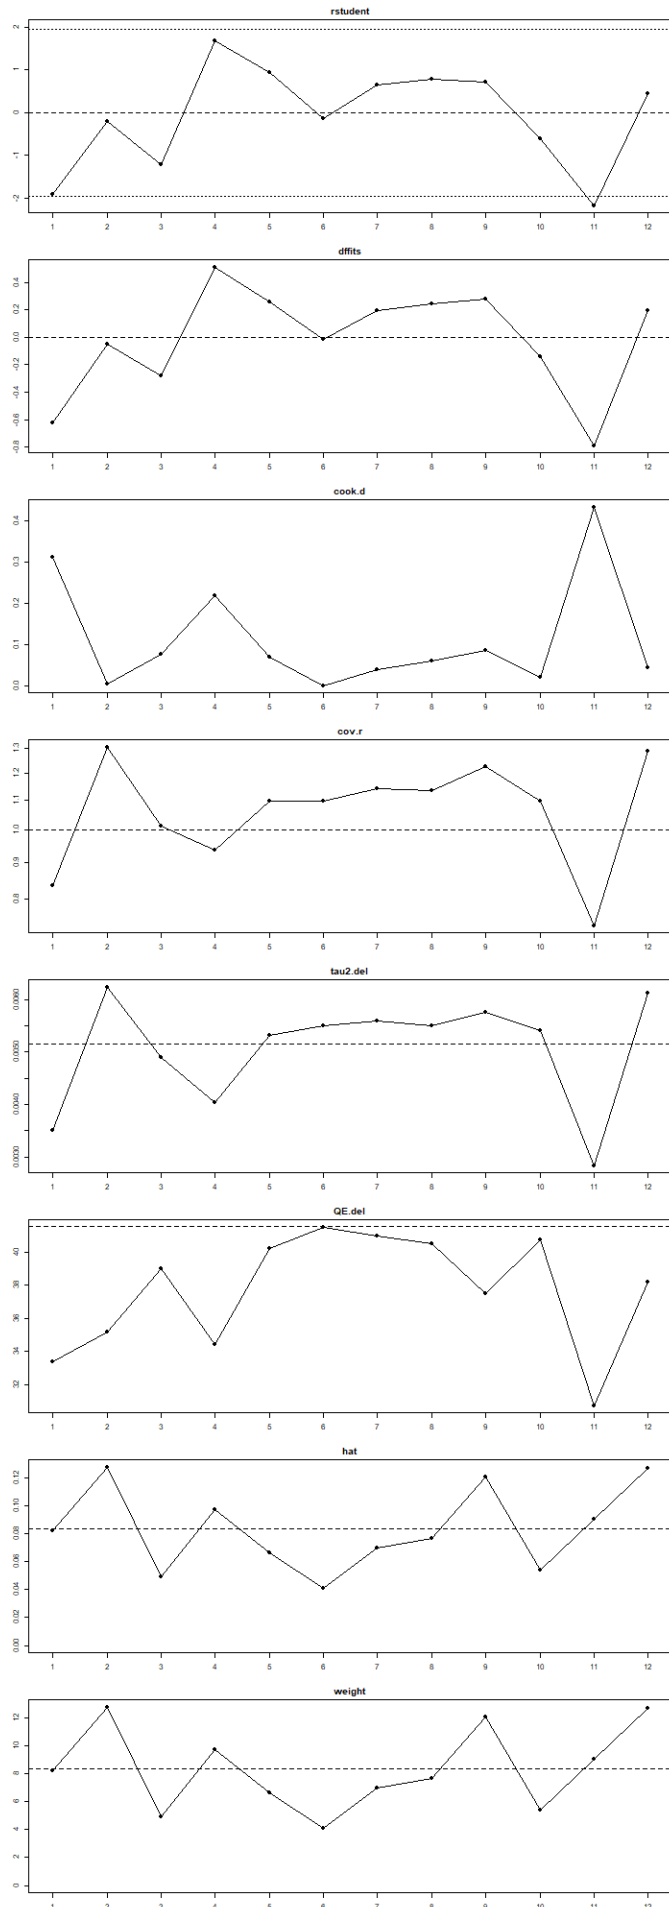



Initial study: 1

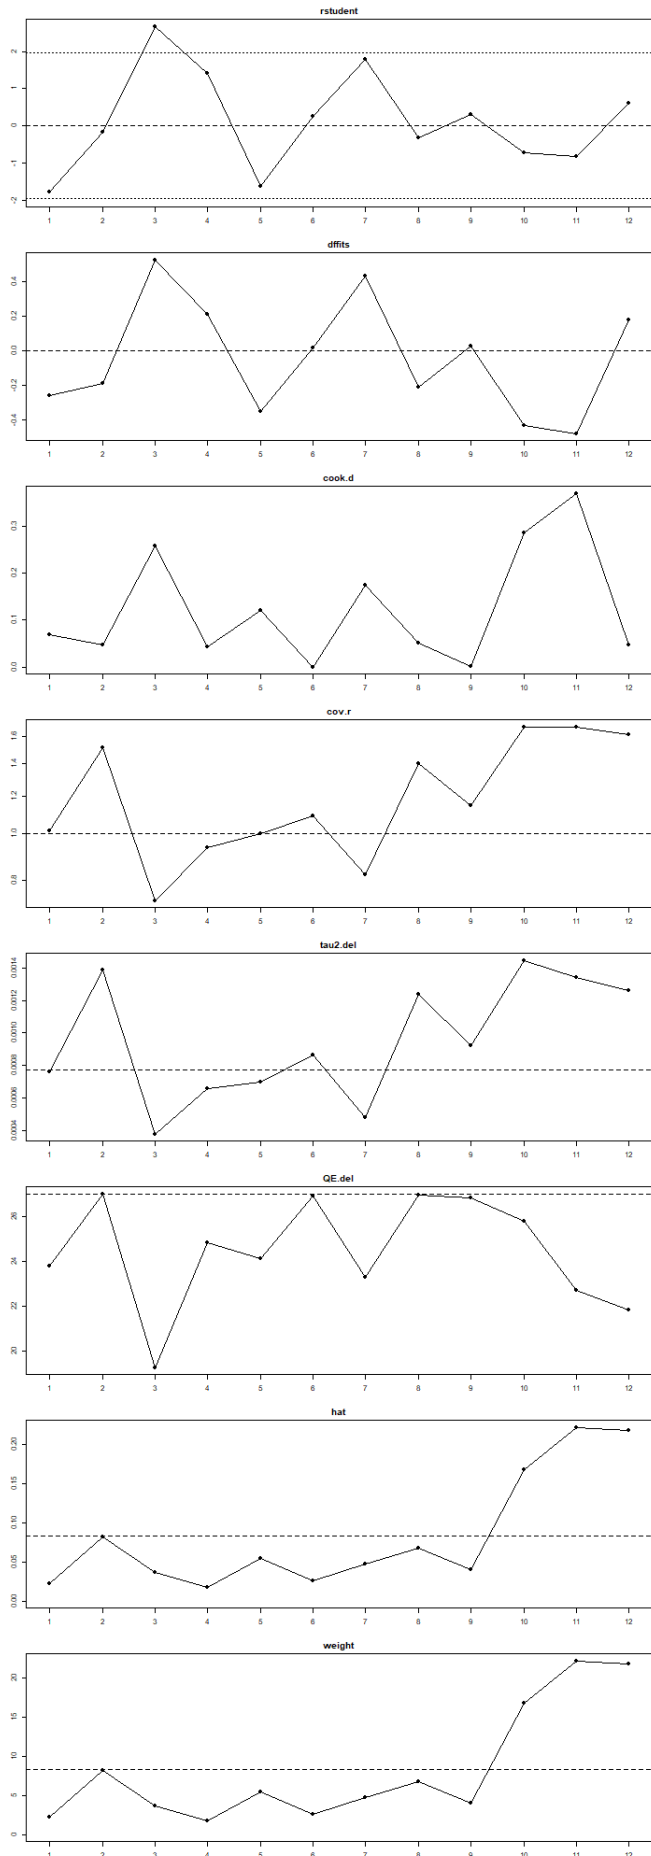

Initial study: 8

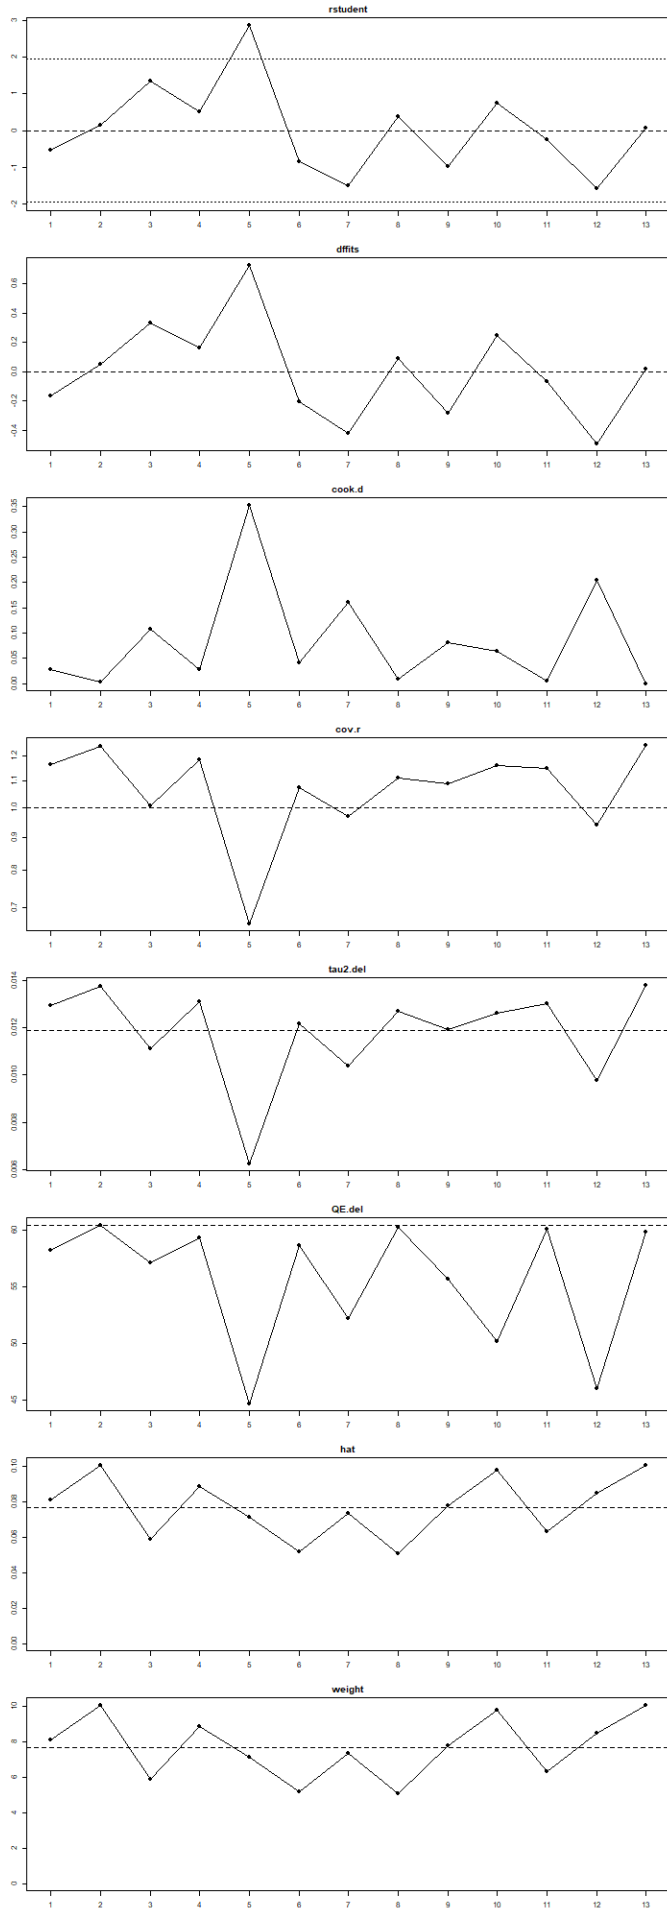

Initial study: 1

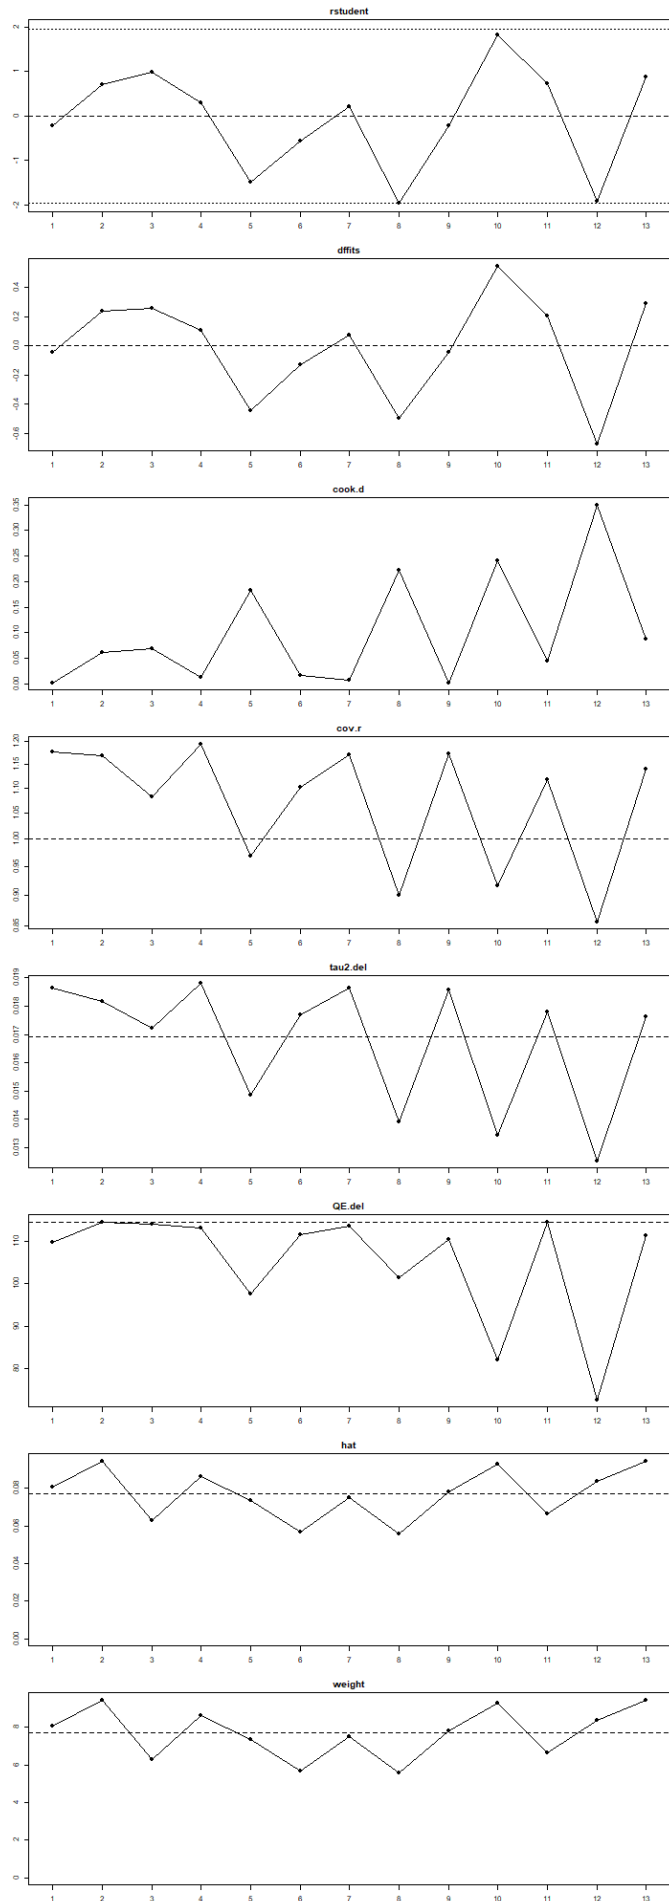

Initial study: 1

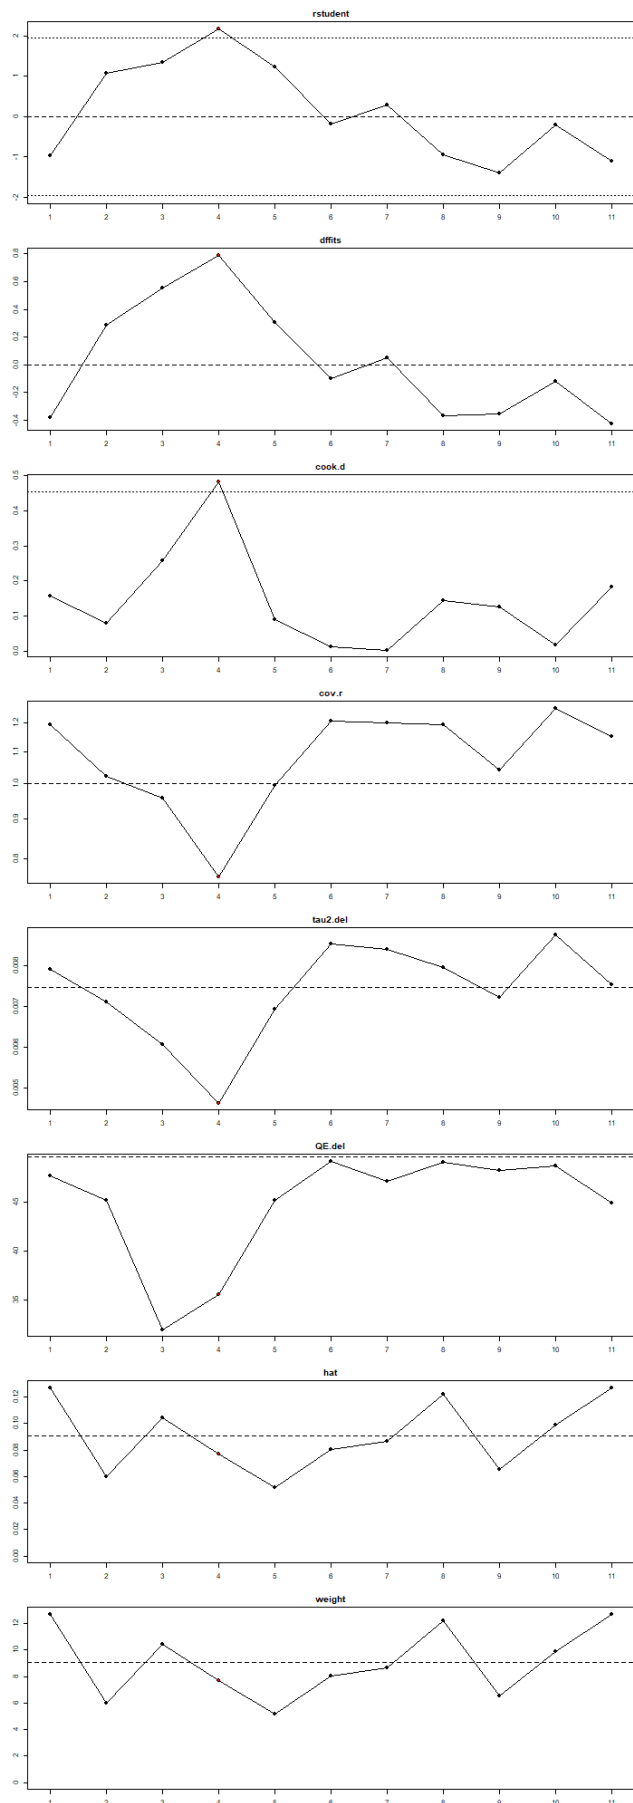

Initial study: 1

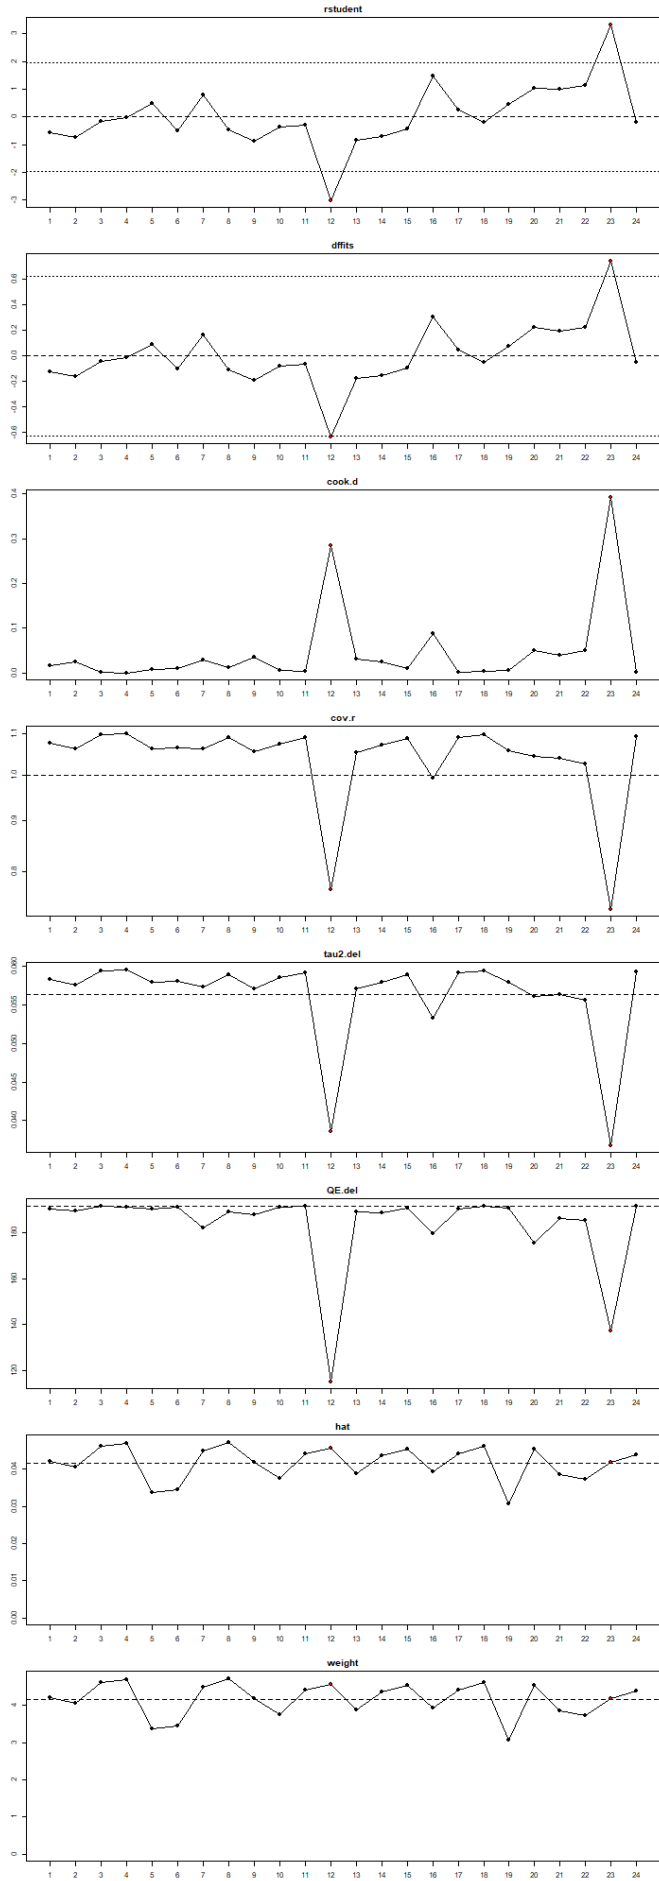

Initial study: 1

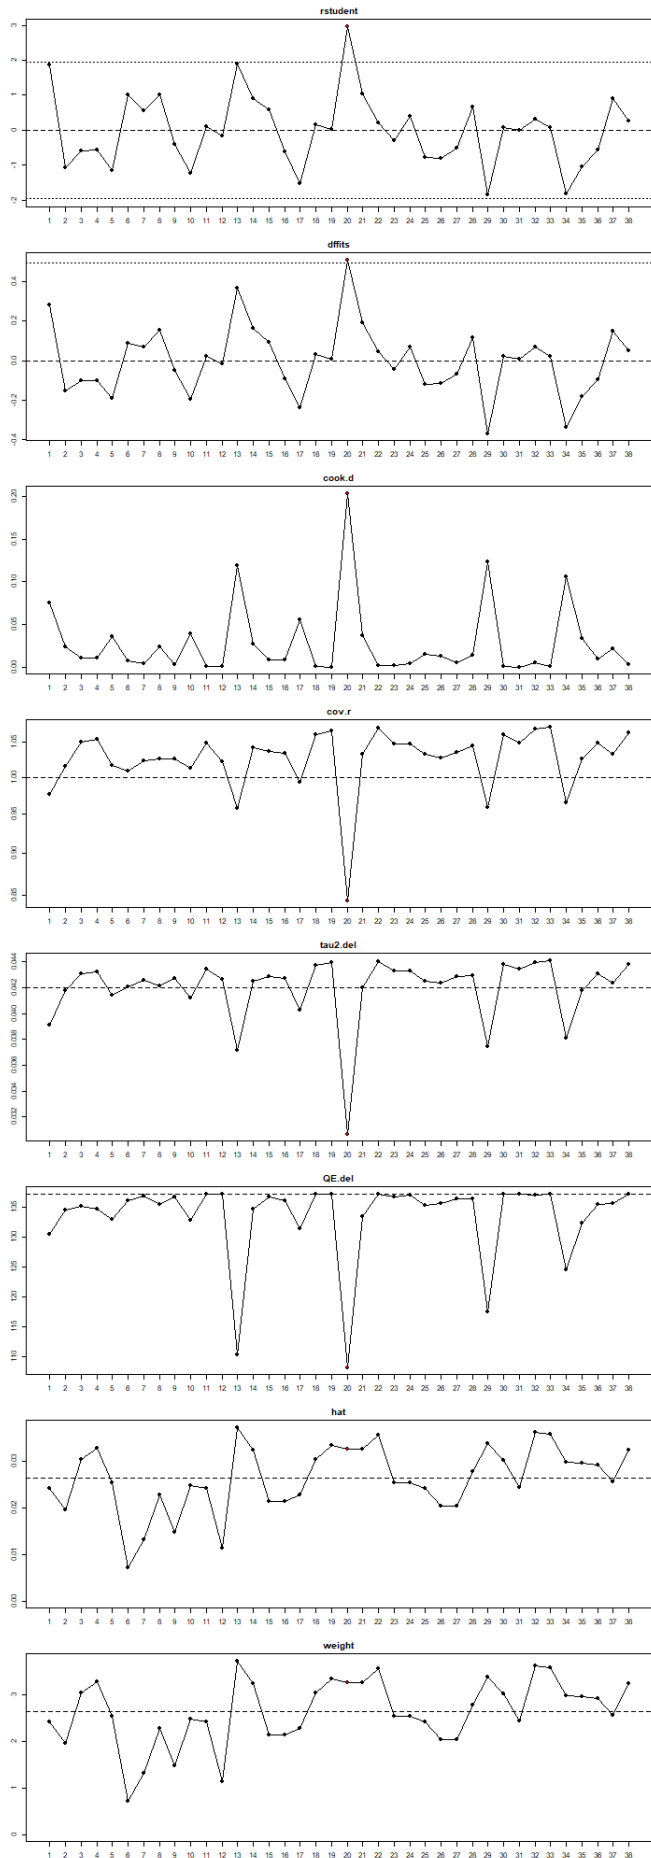

Initial study: 1

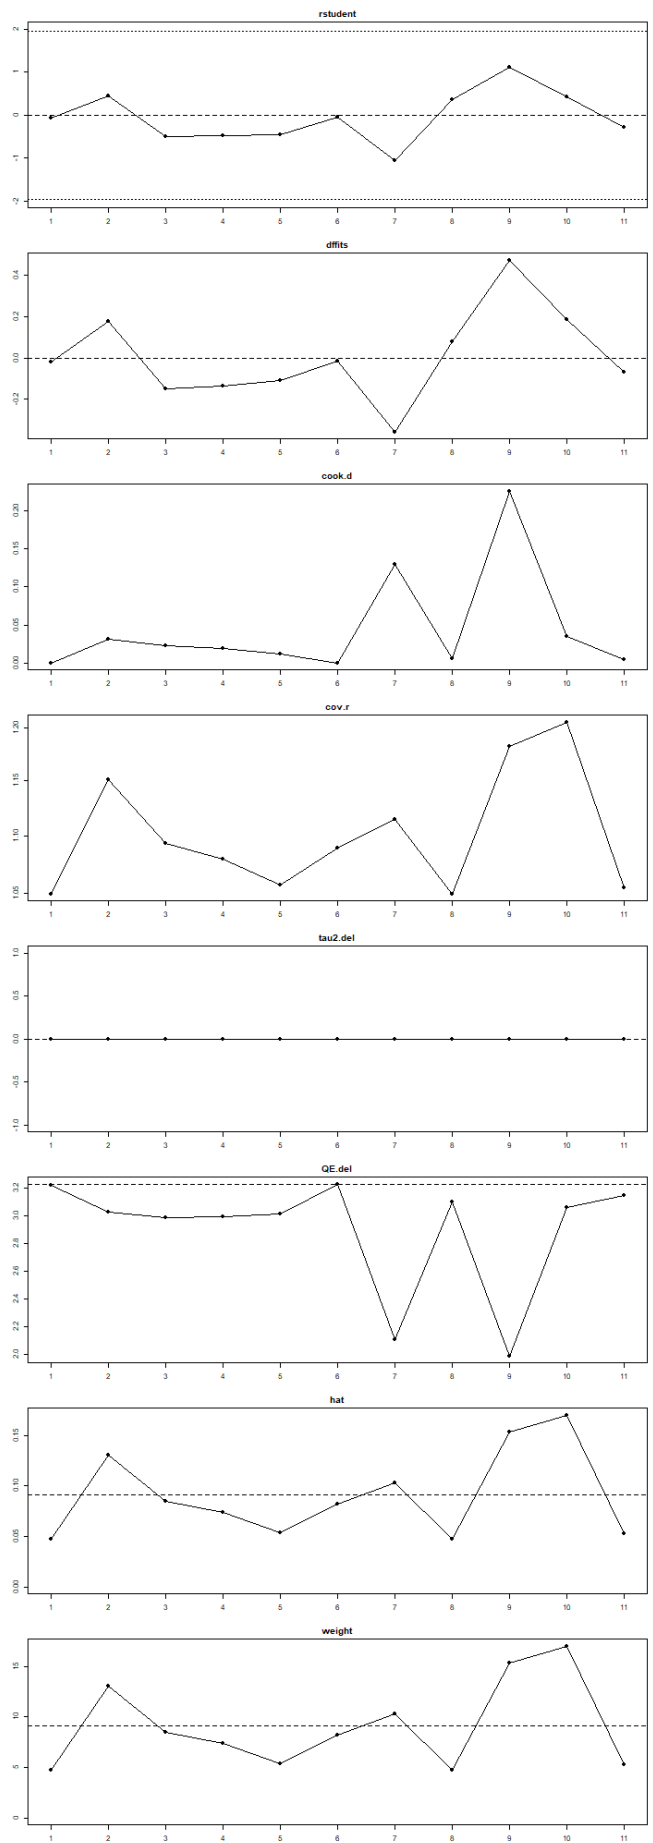

Initial study: 1

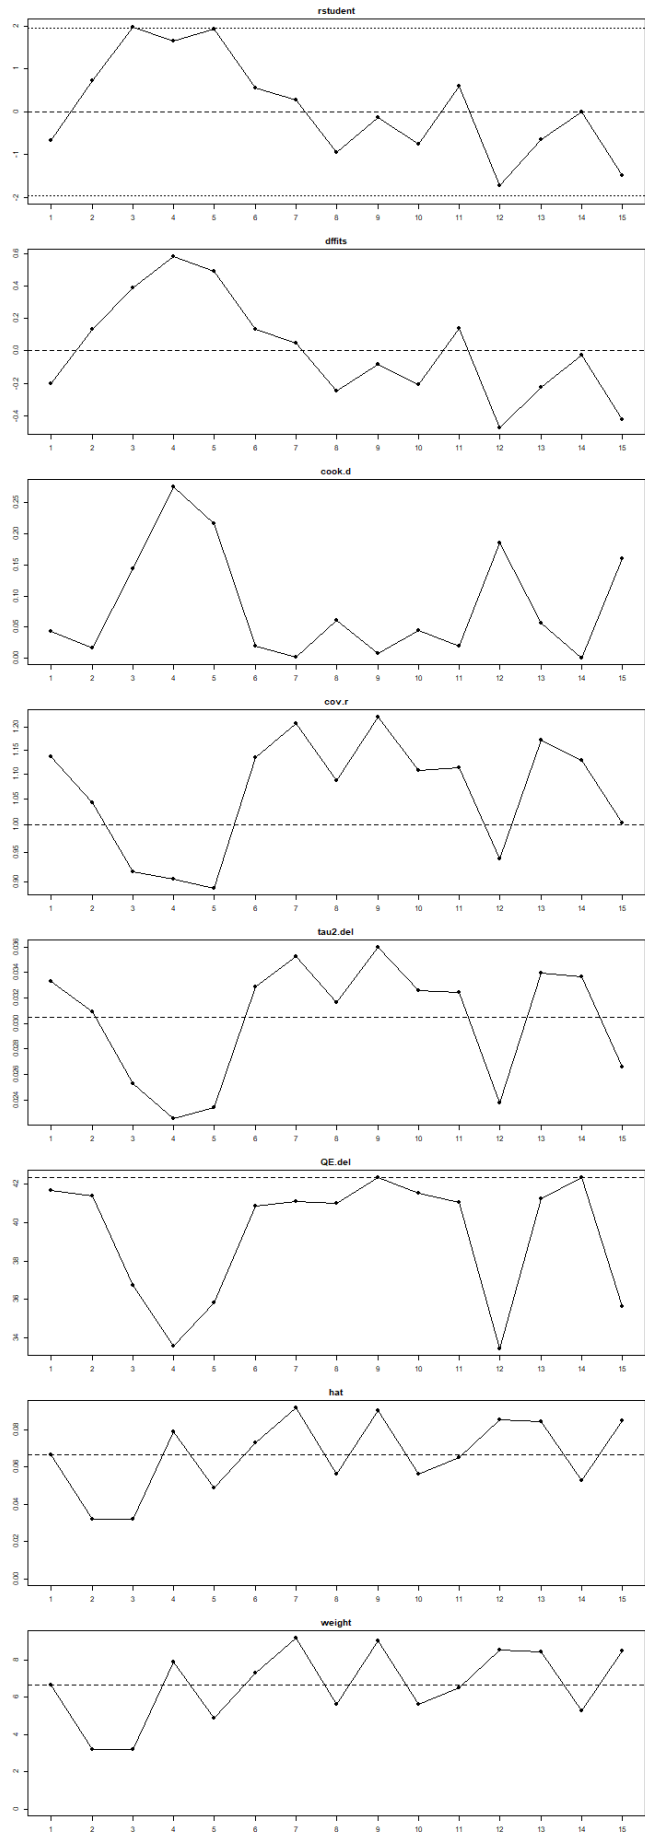



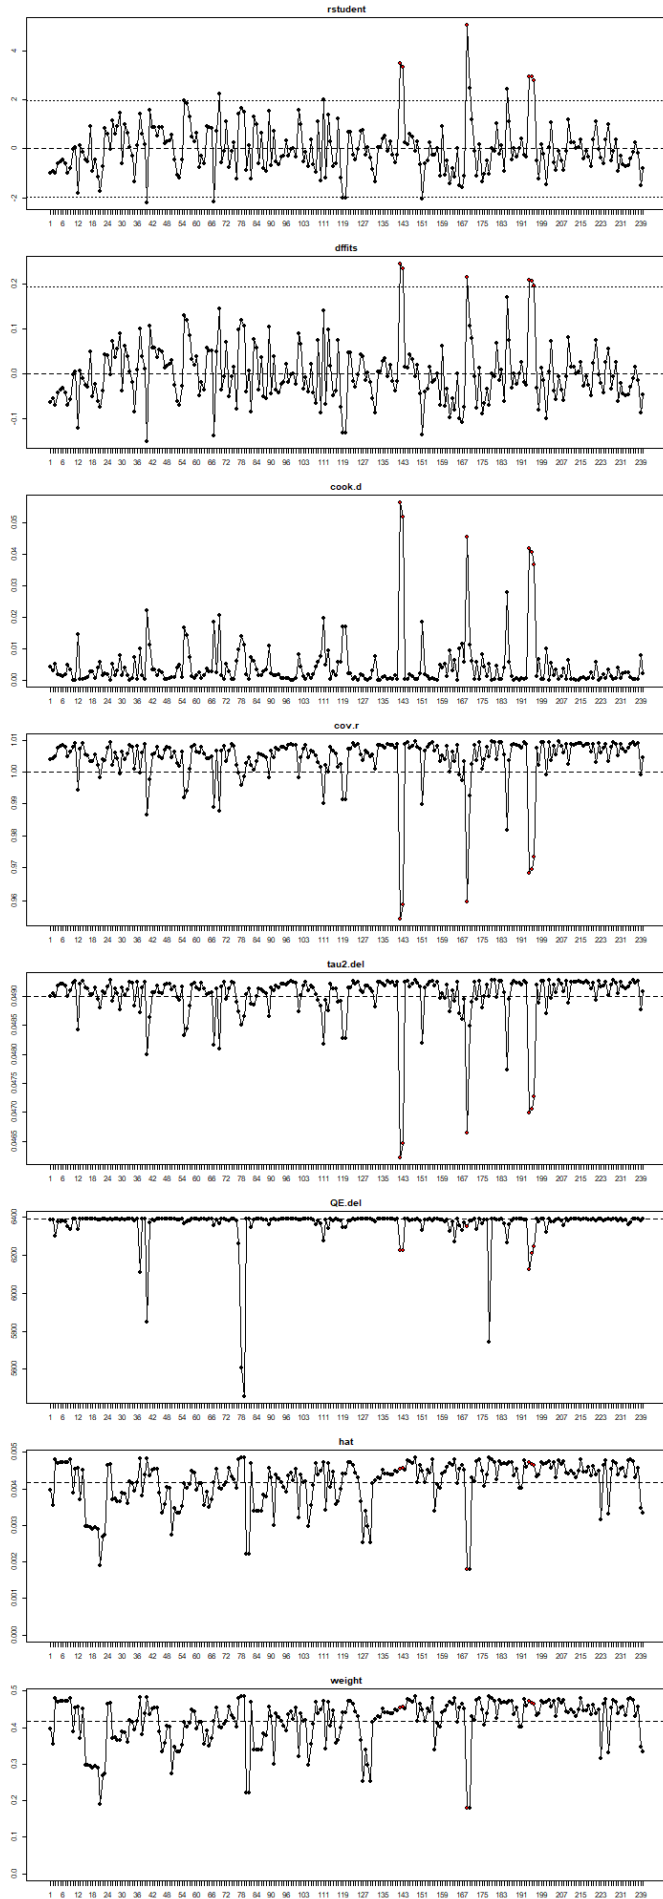

Initial study: 1

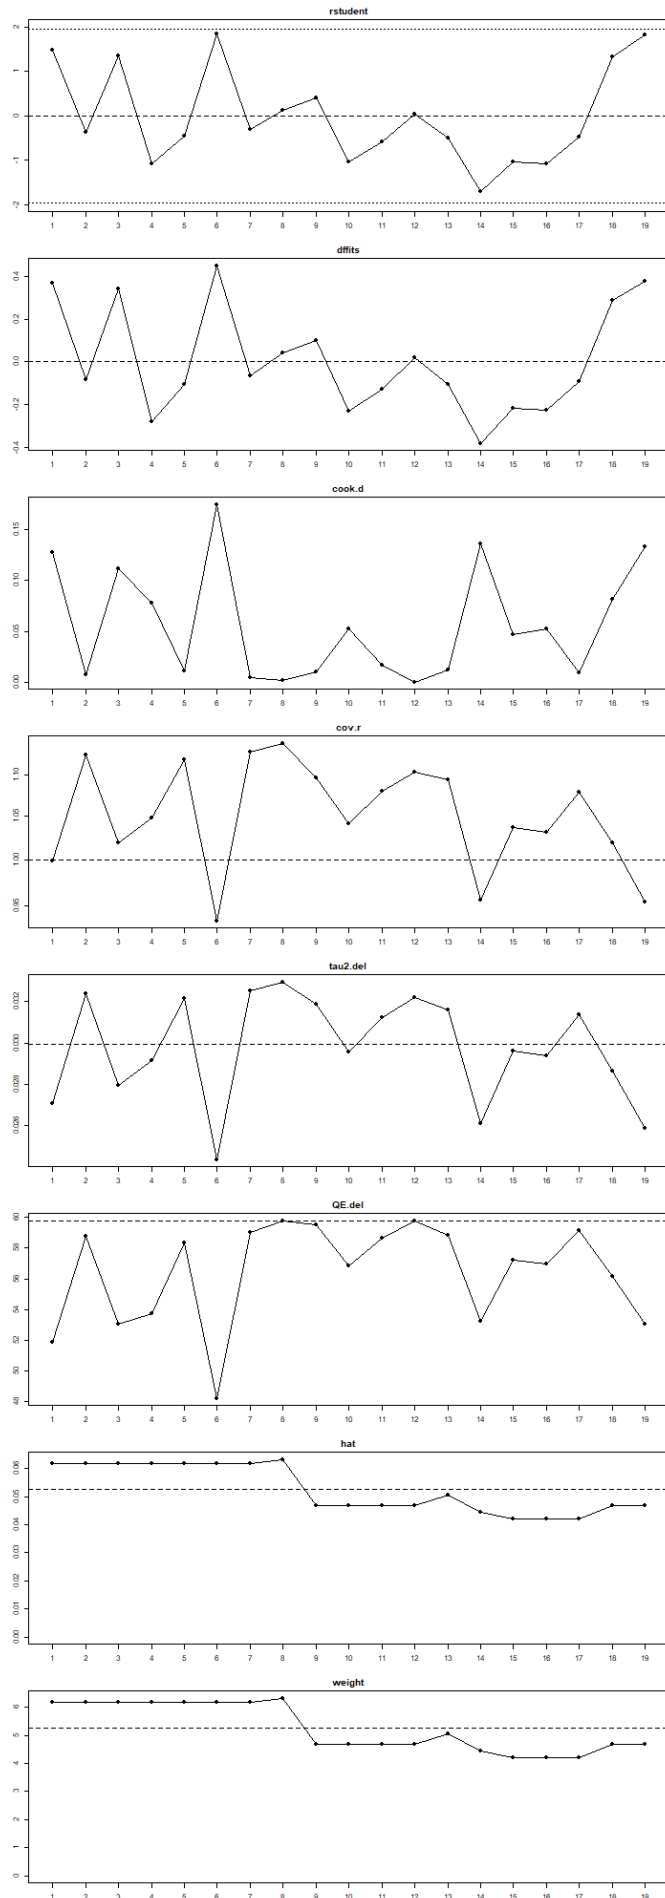

# Shamosh & Gray (2008)

## Initial study: 1

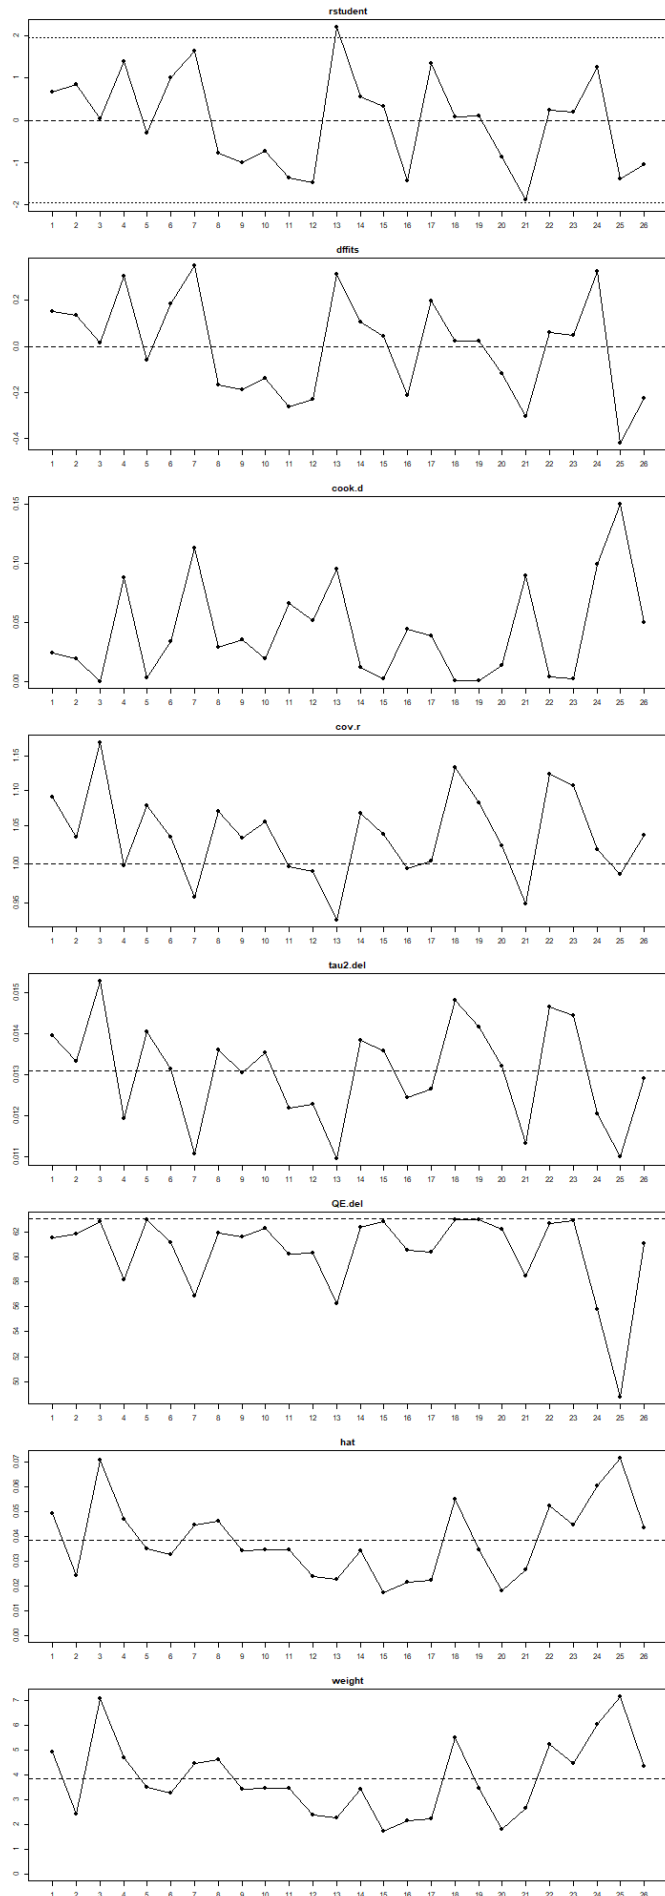

Initial study: 1

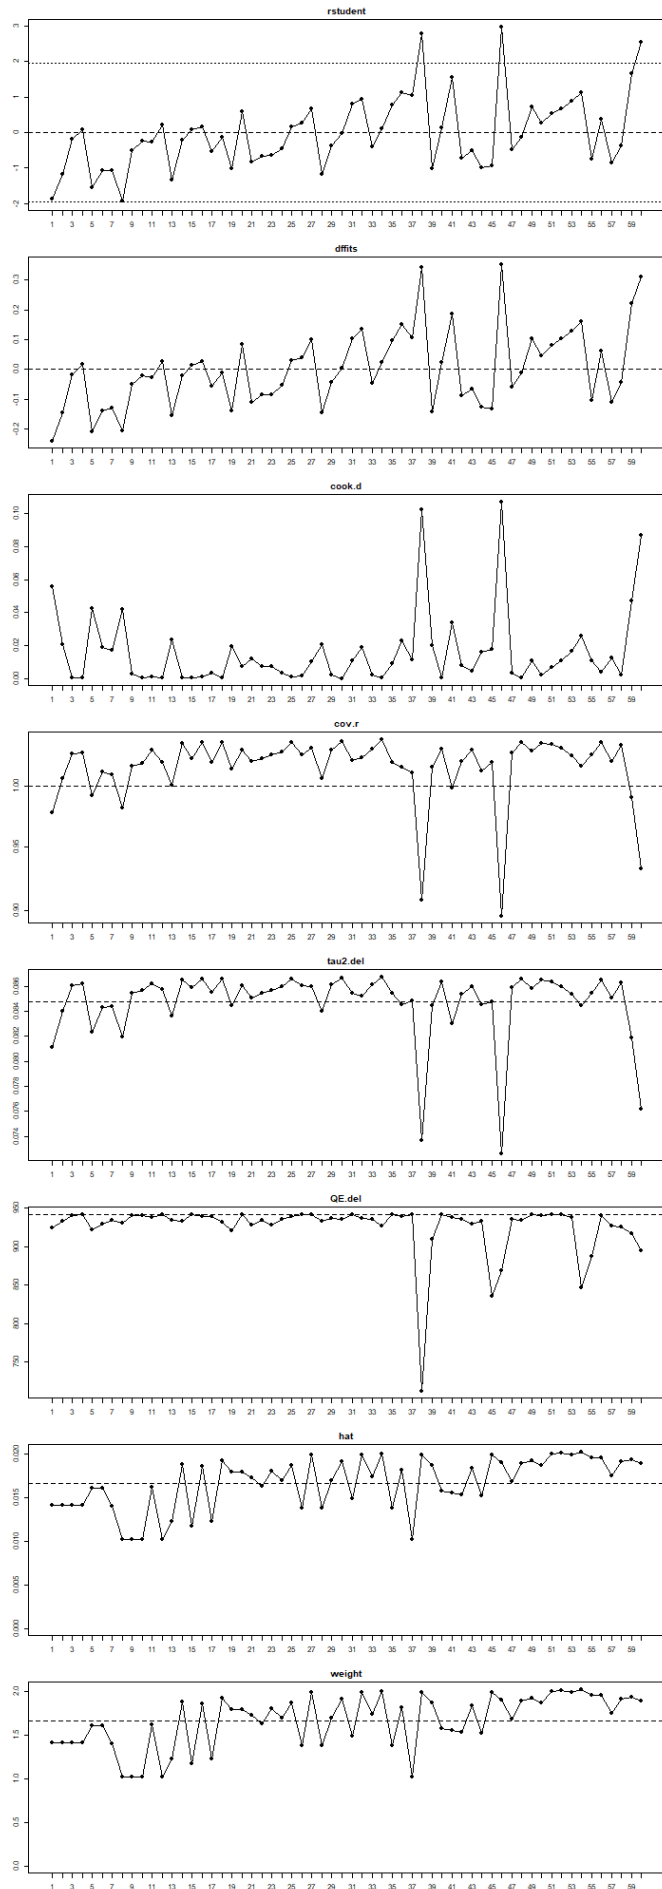

# Webster & Duffy (2016)

## Initial study: 1

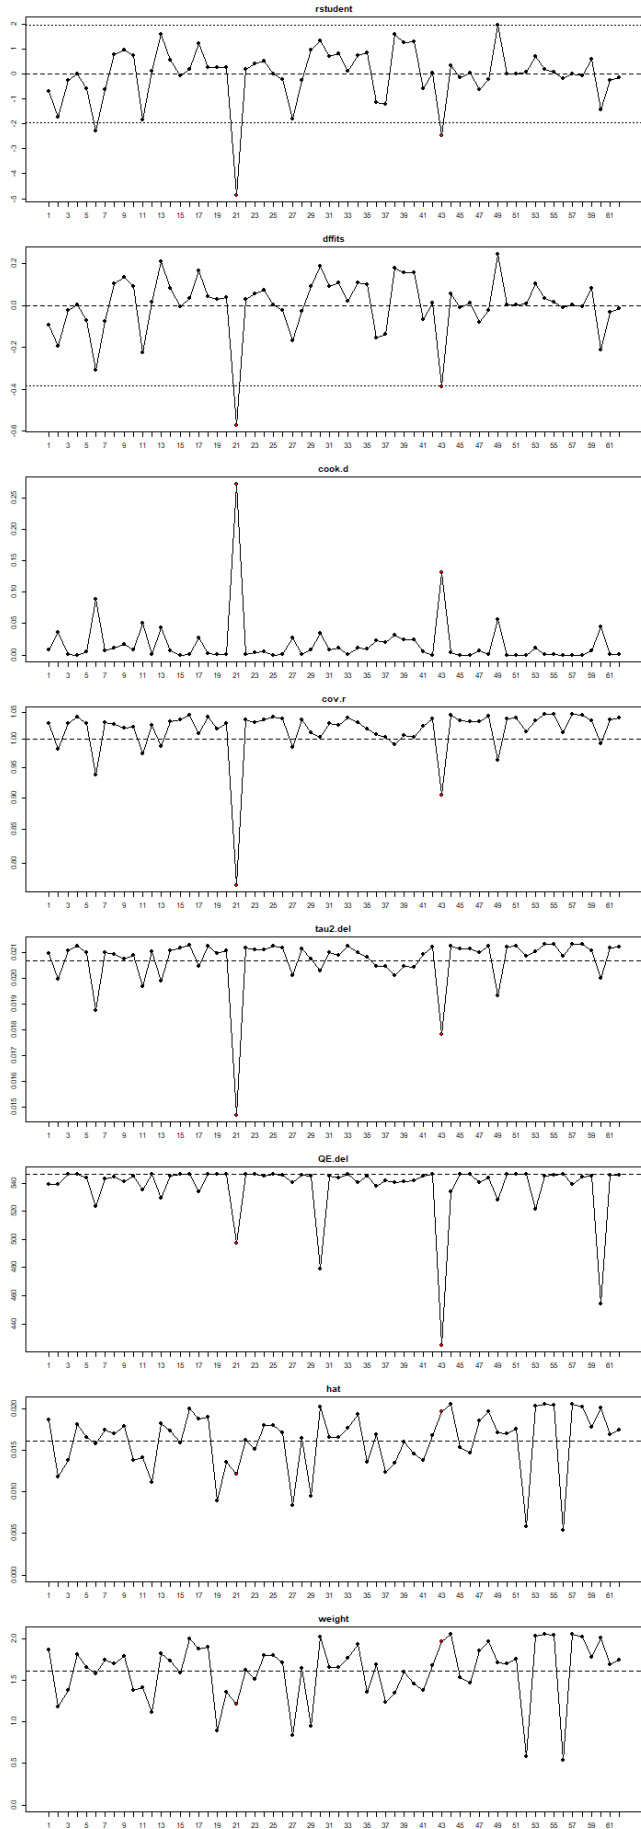

Supplement: Data_Sheet_1.pdf [file Data_Sheet_1.pdf]
